# Supplementary material
Source: PubMed Central journal article supplement (PMC1459311)
Supplement: plntphys_pp.106.076711_1.pdf [file plntphys_pp.106.076711_1.pdf]

|       |            |            |            |            |            |
|-------|------------|------------|------------|------------|------------|
| CaM1  | ~~~~~      | ~~~~~      | ~~~~~      | ~~~~~      | MADQLTDDQI |
| CaM2  | ~~~~~      | ~~~~~      | ~~~~~      | ~~~~~      | MADQLTDEQI |
| CaML2 | MAYSKSYLFL | GLNLFVFLSF | EVLADIVHPP | MLTVEPNLPS | MADQLNDKQI |
| CaML3 | MAYSKSYLFL | SINLFVFLSS | QVLADIVHPP | TLTVEPNLPS | MADQLNDKQI |
| CaML1 | MGYSNSYLFL | GLNLFVFLSS | QALADIVHVP | MLTVEPNLPS | MTDQLNDKQI |
| CaML5 | MVYSKSYLFL | GLNLFVFLSS | QALADIVHSP | MLTVEPNLPS | MADQLNHNQI |
| CaML4 | MDHSKLYLFL | GFGLYVISSS | QILADSYVPL | TLTIEPNLPP | MDDQLNDKQV |
| CaML6 | MPYSKSYLFL | CLVFFVIIFS | LVAADIVHPP | PPIPKINLSP | MINPLTDKQI |

|       |            |            |                |              |            |
|-------|------------|------------|----------------|--------------|------------|
|       | 51         | <b>I</b>   |                | 100          |            |
| CaM1  | SEFKEAFSLF | DKDGDGCITT | KELGTVMRS      | GQNPTAEELQ   | DMINEVDADG |
| CaM2  | SEFKEAFSLF | DKDGDGCITT | KELGTVMRS      | GQNPTAEELQ   | DMINEVDADG |
| CaML2 | SKIKAYFSLI | DKDGDVSI   | EELDTLIR       | STGLNPTDFGLM | VARSKSATDG |
| CaML3 | SKIKAYFSLI | DKDGDVSI   | EELDTLIR       | STGLNPTDFGLM | VARNKSATDG |
| CaML1 | SKIKAYFRL  | DKDQDFS    | DELQTLIR       | SLGLNPTFFGLM | VAMNKHDADG |
| CaML5 | SKIKAYFSLI | DKDEDGFIDN | .....          | .....        | .....      |
| CaML4 | SEFKKAFNLF | DKDGDGCISA | KEFGTLMWSL     | GQNPTFEFLL   | ATMNKHDTDG |
| CaML6 | S.....AF   | DKDQDGF    | FSA AELRHVIITL | GKNVTHEEVN   | EIIEADV    |

|       |            |            |            |             |            |
|-------|------------|------------|------------|-------------|------------|
|       | 101        | <b>II</b>  |            | <b>III</b>  | 150        |
| CaM1  | NGTIDFPEFL | NIMARKMKDT | DSEELKEAF  | RVFDKDQNGF  | ISAAELRHVM |
| CaM2  | NGTIDFPEFL | NIMARKMKDT | DSEELKEAF  | RVFDKDQNGF  | ISAAELRHVM |
| CaML2 | NGTIDF.... | .....      | .TKEELLIVF | SKPNTDHNGF  | VTASELHCYF |
| CaML3 | NGTIDF.... | .....      | .TKEELLIAF | SKPNTDHNGF  | VTASELHYL  |
| CaML1 | NGTIDF.... | .....      | .TEEDFIISF | PKPKDKHNGF  | VSASELHYL  |
| CaML5 | .....      | .....      | ...ENFVAVF | HMC DKDQNGF | VSTSELHYFM |
| CaML4 | NSVIDF.... | .....      | .SEFLNLAAR | M*~~~~~     | ~~~~~      |
| CaML6 | NGLVNYKEFF | NIMCKGWGFI | CD*~~~~~   | ~~~~~       | ~~~~~      |

|       |            |            |            |                |            |
|-------|------------|------------|------------|----------------|------------|
|       | 151        | <b>IV</b>  |            | 195            |            |
| CaM1  | TNLGEKLTDE | EVDEMIREAD | VDGDGQINYE | EFVKVMMA~~     | ~~~~~      |
| CaM2  | TNLGEKLTDE | EVDEMIREAD | VDGDGQINYE | EFVKVMMA~~     | ~~~~~      |
| CaML2 | TNQGKMTIE  | EANEYVRAAD | SDGDGHL    | SFK EFVR...LGR | FTVE*      |
| CaML3 | TNQGKATNE  | EVSDFVREAD | SDSDGHL    | SFK EFVR...LGR | FTVE*      |
| CaML1 | TNHGTVKTK  | EVDEYVREAD | VDGDGQINFE | EFVKAVTMGG     | SIVV*      |
| CaML5 | TYIGQKVTYE | DVEEFVREAD | FDGDGQINIE | EFVKDL         | SRSG SNT*~ |
| CaML4 | ~~~~~      | ~~~~~      | ~~~~~      | ~~~~~          | ~~~~~      |
| CaML6 | ~~~~~      | ~~~~~      | ~~~~~      | ~~~~~          | ~~~~~      |
