# Supplementary material
Source: PubMed Central journal article supplement (PMC1459311)
Supplement: plntphys_pp.106.076711_2.pdf [file plntphys_pp.106.076711_2.pdf]

!!NA\_MULTIPLE\_ALIGNMENT 1.0

PileUp of: @/home/michelle/.seqlab-aril/Calmodulin\_tree.list

Symbol comparison table: GenRunData:pileupdna.cmp CompCheck: 6876

GapWeight: 5  
GapLengthWeight: 1

Calmodulin\_tree.msf MSF: 437 Type: N January 24, 2005 17:22 Check: 6889 ..

|                   |          |             |              |
|-------------------|----------|-------------|--------------|
| Name: MtAF494213  | Len: 437 | Check: 5483 | Weight: 1.00 |
| Name: MtAF494214  | Len: 437 | Check: 3717 | Weight: 1.00 |
| Name: MtAF494212  | Len: 437 | Check: 7271 | Weight: 1.00 |
| Name: PsU13736    | Len: 437 | Check: 4913 | Weight: 1.00 |
| Name: GmL01433    | Len: 437 | Check: 6511 | Weight: 1.00 |
| Name: GmL19359    | Len: 437 | Check: 9871 | Weight: 1.00 |
| Name: NtAB050849  | Len: 437 | Check: 6890 | Weight: 1.00 |
| Name: AtNM_117546 | Len: 437 | Check: 3613 | Weight: 1.00 |
| Name: OsAF231026  | Len: 437 | Check: 289  | Weight: 1.00 |
| Name: OsNM_191034 | Len: 437 | Check: 134  | Weight: 1.00 |
| Name: NtAB050837  | Len: 437 | Check: 8078 | Weight: 1.00 |
| Name: NtAB050838  | Len: 437 | Check: 9215 | Weight: 1.00 |
| Name: StJ04559    | Len: 437 | Check: 9799 | Weight: 1.00 |
| Name: CaAJ010645  | Len: 437 | Check: 9833 | Weight: 1.00 |
| Name: PhM80832    | Len: 437 | Check: 957  | Weight: 1.00 |
| Name: CsAF334833  | Len: 437 | Check: 9327 | Weight: 1.00 |
| Name: CrAF510075  | Len: 437 | Check: 934  | Weight: 1.00 |
| Name: CcAB041712  | Len: 437 | Check: 2246 | Weight: 1.00 |
| Name: CcAB044286  | Len: 437 | Check: 2246 | Weight: 1.00 |
| Name: StAF468661  | Len: 437 | Check: 1028 | Weight: 1.00 |
| Name: SrAF474074  | Len: 437 | Check: 1028 | Weight: 1.00 |
| Name: BoAJ427338  | Len: 437 | Check: 8718 | Weight: 1.00 |
| Name: AtNM_180529 | Len: 437 | Check: 4215 | Weight: 1.00 |
| Name: AtNM_114249 | Len: 437 | Check: 1533 | Weight: 1.00 |
| Name: BjM88307    | Len: 437 | Check: 4773 | Weight: 1.00 |
| Name: AtNM_115539 | Len: 437 | Check: 9019 | Weight: 1.00 |
| Name: AtNM_180013 | Len: 437 | Check: 5562 | Weight: 1.00 |
| Name: AtNM_123137 | Len: 437 | Check: 3349 | Weight: 1.00 |
| Name: AtNM_105312 | Len: 437 | Check: 1926 | Weight: 1.00 |
| Name: AtNM_128261 | Len: 437 | Check: 5400 | Weight: 1.00 |
| Name: NtAB050848  | Len: 437 | Check: 3469 | Weight: 1.00 |
| Name: NtAB050847  | Len: 437 | Check: 4874 | Weight: 1.00 |
| Name: StU20296    | Len: 437 | Check: 6313 | Weight: 1.00 |
| Name: PhM80836    | Len: 437 | Check: 9404 | Weight: 1.00 |
| Name: StU20295    | Len: 437 | Check: 8266 | Weight: 1.00 |
| Name: ScAJ318520  | Len: 437 | Check: 7730 | Weight: 1.00 |
| Name: NtAB050841  | Len: 437 | Check: 4094 | Weight: 1.00 |
| Name: NtAB050842  | Len: 437 | Check: 3956 | Weight: 1.00 |
| Name: NtAB050843  | Len: 437 | Check: 8881 | Weight: 1.00 |
| Name: NtAB050844  | Len: 437 | Check: 5570 | Weight: 1.00 |
| Name: PhM80831    | Len: 437 | Check: 7457 | Weight: 1.00 |
| Name: CaX97558    | Len: 437 | Check: 8651 | Weight: 1.00 |
| Name: TaU48691    | Len: 437 | Check: 7548 | Weight: 1.00 |
| Name: TaU48692    | Len: 437 | Check: 7518 | Weight: 1.00 |
| Name: EgAF295637  | Len: 437 | Check: 5693 | Weight: 1.00 |
| Name: LlL18912    | Len: 437 | Check: 428  | Weight: 1.00 |
| Name: LlZ12839    | Len: 437 | Check: 428  | Weight: 1.00 |

|                  |          |             |              |
|------------------|----------|-------------|--------------|
| Name: OsAF042839 | Len: 437 | Check: 260  | Weight: 1.00 |
| Name: OsAF441190 | Len: 437 | Check: 1892 | Weight: 1.00 |
| Name: OsX65016   | Len: 437 | Check: 1099 | Weight: 1.00 |
| Name: ZmAF031482 | Len: 437 | Check: 7404 | Weight: 1.00 |
| Name: ZmX74490   | Len: 437 | Check: 2488 | Weight: 1.00 |
| Name: TaU48242   | Len: 437 | Check: 4756 | Weight: 1.00 |
| Name: TaU48688   | Len: 437 | Check: 4756 | Weight: 1.00 |
| Name: TaU48689   | Len: 437 | Check: 3865 | Weight: 1.00 |
| Name: ZmX77397   | Len: 437 | Check: 7591 | Weight: 1.00 |
| Name: ZmY13974   | Len: 437 | Check: 5029 | Weight: 1.00 |
| Name: OsL18913   | Len: 437 | Check: 6546 | Weight: 1.00 |
| Name: OsZ12827   | Len: 437 | Check: 6546 | Weight: 1.00 |
| Name: OsAF441191 | Len: 437 | Check: 6582 | Weight: 1.00 |
| Name: HvM27303   | Len: 437 | Check: 2985 | Weight: 1.00 |
| Name: TaU49104   | Len: 437 | Check: 2220 | Weight: 1.00 |
| Name: TaU46893   | Len: 437 | Check: 2220 | Weight: 1.00 |
| Name: TaU49103   | Len: 437 | Check: 5025 | Weight: 1.00 |
| Name: TaU49105   | Len: 437 | Check: 1676 | Weight: 1.00 |
| Name: OsAF042840 | Len: 437 | Check: 7531 | Weight: 1.00 |
| Name: ZmX77396   | Len: 437 | Check: 1179 | Weight: 1.00 |
| Name: MtAF494220 | Len: 437 | Check: 7388 | Weight: 1.00 |
| Name: MsX52398   | Len: 437 | Check: 8258 | Weight: 1.00 |
| Name: VrS81594   | Len: 437 | Check: 6084 | Weight: 1.00 |
| Name: VrL20691   | Len: 437 | Check: 5469 | Weight: 1.00 |
| Name: PvAF030034 | Len: 437 | Check: 7271 | Weight: 1.00 |
| Name: GmL01431   | Len: 437 | Check: 3502 | Weight: 1.00 |
| Name: CaY09853   | Len: 437 | Check: 7768 | Weight: 1.00 |
| Name: PvAF030033 | Len: 437 | Check: 202  | Weight: 1.00 |
| Name: AhAY517930 | Len: 437 | Check: 2997 | Weight: 1.00 |
| Name: EcAY297816 | Len: 437 | Check: 9557 | Weight: 1.00 |
| Name: PaAF292108 | Len: 437 | Check: 1730 | Weight: 1.00 |
| Name: PcAY275526 | Len: 437 | Check: 4554 | Weight: 1.00 |
| Name: HaU79736   | Len: 437 | Check: 1547 | Weight: 1.00 |
| Name: BdL14071   | Len: 437 | Check: 6462 | Weight: 1.00 |
| Name: DcX59751   | Len: 437 | Check: 7133 | Weight: 1.00 |
| Name: DCaY364012 | Len: 437 | Check: 7124 | Weight: 1.00 |
| Name: NtAB050845 | Len: 437 | Check: 9016 | Weight: 1.00 |
| Name: NtAB050846 | Len: 437 | Check: 1773 | Weight: 1.00 |
| Name: CaU83402   | Len: 437 | Check: 4588 | Weight: 1.00 |
| Name: CaAF108889 | Len: 437 | Check: 4588 | Weight: 1.00 |
| Name: CaX98404   | Len: 437 | Check: 5331 | Weight: 1.00 |
| Name: StU20294   | Len: 437 | Check: 8350 | Weight: 1.00 |
| Name: NtAB050839 | Len: 437 | Check: 3099 | Weight: 1.00 |
| Name: NtAB050840 | Len: 437 | Check: 2874 | Weight: 1.00 |
| Name: ScAJ318521 | Len: 437 | Check: 7231 | Weight: 1.00 |
| Name: FsX97612   | Len: 437 | Check: 1453 | Weight: 1.00 |
| Name: BnAF150059 | Len: 437 | Check: 5592 | Weight: 1.00 |
| Name: MtAF494219 | Len: 437 | Check: 8950 | Weight: 1.00 |
| Name: PsU13882   | Len: 437 | Check: 6504 | Weight: 1.00 |
| Name: VrL20507   | Len: 437 | Check: 6756 | Weight: 1.00 |
| Name: PvAF030032 | Len: 437 | Check: 9537 | Weight: 1.00 |
| Name: GmL01432   | Len: 437 | Check: 6130 | Weight: 1.00 |
| Name: GmL01430   | Len: 437 | Check: 8217 | Weight: 1.00 |
| Name: AhAY517931 | Len: 437 | Check: 2519 | Weight: 1.00 |
| Name: MdX60738   | Len: 437 | Check: 7737 | Weight: 1.00 |
| Name: VvAY070232 | Len: 437 | Check: 5814 | Weight: 1.00 |
| Name: BpX89890   | Len: 437 | Check: 4096 | Weight: 1.00 |

|                   |          |             |              |
|-------------------|----------|-------------|--------------|
| Name: PpX90560    | Len: 437 | Check: 1885 | Weight: 1.00 |
| Name: MsY13784    | Len: 437 | Check: 4730 | Weight: 1.00 |
| Name: DsU62865    | Len: 437 | Check: 49   | Weight: 1.00 |
| Name: MtAF494215  | Len: 437 | Check: 4053 | Weight: 1.00 |
| Name: AtNM_129674 | Len: 437 | Check: 9678 | Weight: 1.00 |
| Name: MtAF494216  | Len: 437 | Check: 8641 | Weight: 1.00 |
| Name: MtAF494218  | Len: 437 | Check: 844  | Weight: 1.00 |

//

|             |            |            |            |            |            |
|-------------|------------|------------|------------|------------|------------|
|             | 1          |            |            |            | 50         |
| MtAF494213  | ATGGCCGATC | AACTCAATGA | CAAGCAAATC | TCAAAGATAA | AGGCGTATTT |
| MtAF494214  | ATGGCCGATC | AACTCAATGA | CAAGCAAATC | TCAAAGATAA | AGGCGTATTT |
| MtAF494212  | ATGACCGATC | AACTCAATGA | CAAGCAAATC | TCAAAGATAA | AGGCGTATTT |
| PsU13736    | ATGGCACATA | TCCTAAGTGA | AGAACAAATT | GTTGATTTCA | AAGAAGCCTT |
| GmL01433    | ATGGCAGATA | TCCTGAGTGA | AGAACAGATT | GTTGATTTTA | AAGAGGCCTT |
| GmL19359    | ATGGCAGATG | TTCTGAGTGA | AGAACAGATT | AGTGAGATCA | AAGAAGCCTT |
| NtAB050849  | ATGGGAGATA | TACTGAACCA | AGATCAAATT | GTTGAATTGC | AAGAAGCTTT |
| AtNM_117546 | GAAGAAACAG | CACTGACAAA | AGATCAGATC | ACTGAGTTCA | AAGAAGCCTT |
| OsAF231026  | ATGGCGGACC | AGCTCTCCGA | AGAGCAGATT | GTAGAGTTCA | GGGAGGCCTT |
| OsNM_191034 | ATGGCGGACC | AGCTCTCCGA | AGAGCAGATT | GGAGAGTTCA | GGGAGGCCTT |
| NtAB050837  | ATGGCAGAGC | AGCTAACGGA | GGAGCAGATC | GCTGAGTTCA | AGGAGGCCTT |
| NtAB050838  | ATGGCAGAGC | AGCTAACGGA | GGAGCAGATC | GCTGAGTTCA | AGGAGGCCTT |
| StJ04559    | ATGGCAGAGC | AGCTGACGGA | GGAGCAGATC | GCCGAGTTCA | AGGAAGCTTT |
| CaAJ010645  | ATGGCAGAGC | AGCTAACAGA | GGAGCAGATC | GCTGAATTCA | AGGAGGCCTT |
| PhM80832    | ATGGCGGAAC | AGCTAACGGA | GGAGCAGATC | GCTGAGTTTA | AGGAAGCTTT |
| CsAF334833  | ATGGCAGGAC | AACTTACA.. | .GGACAAATC | GCAGAGTTTA | AGGGGATCTT |
| CrAF510075  | ATGGCTGAGC | AACTCACCAC | TGATCAGATT | GCGGAGTTCA | AGGAGGCCTT |
| CcAB041712  | ATGTCTGAT. | ..TTGACCGA | CGAGCAGATC | TCCGAGTTCA | AGGAGGCCTT |
| CcAB044286  | ATGTCTGAT. | ..TTGACCGA | CGAGCAGATC | TCCGAGTTCA | AGGAGGCCTT |
| StAF468661  | ATGGCGGATC | CGCTCACCGA | CGATCAGATC | TCCGAATTTA | AGGAAGCTTT |
| SrAF474074  | ATGGCGGATC | CGCTCACCGA | CGATCAGATC | TCCGAATTTA | AGGAAGCTTT |
| BoAJ427338  | ATGGCGGATC | AGCTGACCGA | TGACCAGATC | TCAGAGTTCA | AGGAAGCCTT |
| AtNM_180529 | ATGGCGGATC | AGCTCACCGA | TGACCAGATC | TCAGAGTTCA | AGGAAGCCTT |
| AtNM_114249 | ATGGCGGATC | AGCTAACCGA | TGACCAGATC | TCCGAGTTCA | AGGAAGCTTT |
| BjM88307    | ATGGCGGATC | AGCTCACCGA | CGATCAGATC | TCTGAGTTCA | AGGAAGCCTT |
| AtNM_115539 | ATGGCGGATC | AGCTCACCGA | CGATCAGATC | TCTGAGTTTA | AGGAAGCTTT |
| AtNM_180013 | ATGGCGGATC | AGCTCACAGA | CGATCAGATC | TCAGAATTCA | AGGAAGCCTT |
| AtNM_123137 | ATGGCGGATC | AACTCACTGA | CGAACAGATC | TCCGAATTTA | AGGAAGCTTT |
| AtNM_105312 | ATGGCGGATC | AGCTAACTGA | TGAACAGATC | TCTGAGTTTA | AGGAAGCTTT |
| AtNM_128261 | ATGGCAGATC | AGCTCACCGA | TGATCAGATC | TCTGAGTTCA | AGGAAGCTTT |
| NtAB050848  | ATGGCAGATC | AGCTCACAGA | TGATCAGATC | TCTGAATTCA | AAGAAGCTTT |
| NtAB050847  | ATGGCAGATC | AGCTCACAGA | TGATCAGATC | TCTGAATTCA | AAGAAGCTTT |
| StU20296    | ATGGCAGATC | AGCTCACCGA | AGATCAGATC | TCTGAGTTCA | AGGAAGCCTT |
| PhM80836    | ATGGCGGATC | AGCTTACAGA | TGATCAGATC | TCTGAGTTTA | AGGAAGCCTT |
| StU20295    | ATGGCGGATC | AGCTCACCGA | AGATCAGATC | TCTGAGTTCA | AGGAAGCCTT |
| ScAJ318520  | ATGGCGGATC | AGCTCACCGA | AGATCAGATC | TCTGAGTTCA | AGGAAGCCTT |
| NtAB050841  | ATGGCGGATC | AGCTCACCGA | CGATCAGATC | TCTGAGTTCA | AAGAAGCCTT |
| NtAB050842  | ATGGCGGATC | AGCTCACCGA | CGATCAGATC | TCTGAGTTCA | AAGAAGCCTT |
| NtAB050843  | ATGGCGGATC | AGCTGACTGA | CGATCAGATC | TCTGAGTTCA | AAGAAGCCTT |
| NtAB050844  | ATGGCGGATC | AGCTGACTGA | CGATCAGATC | TCTGAGTTTA | AAGAAGCCTT |
| PhM80831    | ATGGCAGATC | AACTCACTGA | TGATCAGATC | TCTGAGTTCA | AAGAAGCCTT |
| CaX97558    | ATGGCAGATC | AGCTAACTGA | TGATCAGATC | TCTGAGTTCA | AAGAAGCTTT |
| TaU48691    | ATGGCGGACC | AGCTCACCGA | CGACCAGATC | GCCGAATTTA | AGGAGGCCTT |
| TaU48692    | ATGGCGGACC | AGCTCACCGA | CGACCAGATC | GCCGAGTTCA | AGGAGGCCTT |
| EgAF295637  | ATGGCCGATC | AGCTCACGGA | CGACCAGATC | TCTGAGTTCA | AGGAAGCCTT |
| LlL18912    | ATGGCGGATC | AGCTCACTGA | CGATCAGATC | TCCGAGTTTA | AGGAGGCCTT |

|            |            |            |            |            |            |
|------------|------------|------------|------------|------------|------------|
| LlZ12839   | ATGGCGGATC | AGCTCACTGA | CGATCAGATC | TCCGAGTTTA | AGGAGGCGTT |
| OsAF042839 | ATGGCGGACC | AGCTCACCGA | CGAGCAGATC | GCCGAGTTCA | AGGAGGCGTT |
| OsAF441190 | ATGGCGGACC | AGCTCACCGA | CGAGCAGATC | GCCGAGTTCA | AGGAGGCGTT |
| OsX65016   | ATGGCGGATC | AGCTCACCGA | CGAGCAGATC | GCCGAGTTCA | AGGAGGCGTT |
| ZmAF031482 | ATGGCGGACC | AGCTCACCGA | CGAGCAGATC | GCCGAGTTCA | AGGAGGCCTT |
| ZmX74490   | ATGGCGGACC | AGCTCACCGA | CGAGCAGATC | GCCGAGTTCA | AGGAGGCCTT |
| TaU48242   | ATGGCGGACC | AGCTCACCGA | CGACCAGATC | GCCGAGTTCA | AGGAGGCCTT |
| TaU48688   | ATGGCGGACC | AGCTCACCGA | CGACCAGATC | GCCGAGTTCA | AGGAGGCCTT |
| TaU48689   | ATGGCGGACC | AGCTCACCGA | CGACCAGATC | GCCGAGTTCA | AGGAGGCCTT |
| ZmX77397   | ATGGCGGACC | AGCTCACCGA | CGAACAGATC | GCCGAGTTCA | AGGAGGCCTT |
| ZmY13974   | ATGGCGGACC | AGCTCACCGA | CGAGCAGATC | GCCGAGTTCA | AGGAAGCATT |
| OsL18913   | ATGGCAGATC | AGCTCACCGA | CGACCAGATC | GCCGAGTTCA | AGGAGGCCTT |
| OsZ12827   | ATGGCAGATC | AGCTCACCGA | CGACCAGATC | GCCGAGTTCA | AGGAGGCCTT |
| OsAF441191 | ATGGCGGATC | AGCTCACCGA | CGACCAGATC | GCCGAGTTCA | AGGAGGCCTT |
| HvM27303   | ATGGCGGATC | AGCTCACCGA | CGACCAGATC | GCCGAGTTCA | AGGAGGCCTT |
| TaU49104   | ATGGCGGATC | AGCTCACCGA | CGACCAGATC | GCCGAGTTCA | AGGAGGCCTT |
| TaU46893   | ATGGCGGATC | AGCTCACCGA | CGACCAGATC | GCCGAGTTCA | AGGAGGCCTT |
| TaU49103   | ATGGCGGATC | AGCTCACCGA | CGACCAGATC | GCCGAGTTCA | AGGAGGCCTT |
| TaU49105   | ATGGCGGACC | AACTCACCGA | CGACCAGATC | GCCGAGTTCA | AGGAAGCCTT |
| OsAF042840 | ATGGCGGACC | AGCTCACCGA | CGACCAGATC | GCCGAGTTCA | AGGAGGCCTT |
| ZmX77396   | ATGGCGGACC | AGCTCACCGA | CGACCAGACC | GCCGAGTTCA | AGGAGGCCTT |
| MtAF494220 | ATGGCCGATC | AACTCACCGA | CGAGCAGATC | TCTGAGTTCA | AGGAAGCTTT |
| MsX52398   | ATGGCCGATC | AACTCACCGA | CGAGCAGATC | TCTGAGTTTA | AGGAAGCTTT |
| VrS81594   | ATGGCCGACC | AGCTCACCGA | CGACCAGATC | GCCGAGTTCA | AGGAGGCCTT |
| VrL20691   | ATGGCCGACC | AGCTCACCGA | CGACCAGATC | GCCGAGTTCA | AGGAGGCCTT |
| PvAF030034 | ATGGCCGACC | AGCTCACCGA | CGAACAGATC | GCCGAGTTTA | AGGAGGCCTT |
| GmL01431   | ATGGCCGACC | AGCTCACCGA | CGACCAGATC | GCCGAGTTCA | AGGAGGCCTT |
| CaY09853   | ATGGCCGACC | AGCTCACCGA | CGATCAGATC | GCTGAGTTCA | AGGAAGCCTT |
| PvAF030033 | ATGGCCGATC | AACTCACCGA | CGAGCAGATC | TCCGAGTTCA | AGGAAGCCTT |
| AhAY517930 | ATGGCGGATC | CGCTCACCGA | CGAACAGATC | TCCGAGTTCA | AGGAGGCCTT |
| EcAY297816 | ATGGCAGATC | AACTCACAGA | CGATCAGATC | TCTGAGTTTA | AGGAAGCTTT |
| PaAF292108 | ATGGCCGATC | AGCTCACAGA | CGACCAGATC | TCAGAGTTCA | AGGAGGCTTT |
| PcAY275526 | ATGGCCGATC | AGCTCACCGA | CGACCAGATC | TCCGAGTTCA | AGGAGGCGTT |
| HaU79736   | ATGGCGGATC | AGCTTACAGA | AGATCAGATC | TCTGAATTCA | AGGAGGCTTT |
| BdL14071   | ATGGCTGACC | AGCTTACCGA | CGATCAGATC | TCCGAGTTCA | AGGAGGCATT |
| DcX59751   | ATGGCCGATC | AACTCACCGA | CGATCAGATC | TCCGAGTTCA | AGGAAGCTTT |
| DcAY364012 | ATGGCCGATC | AGCTGACGGA | CGACCAGATC | TCCGAGTTCA | AGGAAGCTTT |
| NtAB050845 | ATGGCGGATC | AGCTGACCGA | TGATCAGATC | TCTGAGTTTA | AGGAGGCTTT |
| NtAB050846 | ATGGCGGATC | AGCTGACCGA | TGATCAGATC | TCTGAGTTTA | AGGAGGCTTT |
| CaU83402   | ATGGCAGATC | AGCTCACCGA | TGATCAGATC | TCTGAGTTTA | AGGAGGCTTT |
| CaAF108889 | ATGGCAGATC | AGCTCACCGA | TGATCAGATC | TCTGAGTTTA | AGGAGGCTTT |
| CaX98404   | ATGGCAGATC | AGCTCACCGA | TGATCAGATC | TCTGAGTTTA | AGGAGGCTTT |
| StU20294   | ATGGCAGATC | AGCTCACCGA | AGATCAGATC | TCTGAGTTCA | AGGAGGCTTT |
| NtAB050839 | ATGGCGGATC | AGCTAACCGA | TGACCAGATC | TCTGAGTTCA | AGGAGGCCTT |
| NtAB050840 | ATGGCGGATC | AGCTAACCGA | TGACCAGATC | TCTGAGTTCA | AGGAGGCCTT |
| ScAJ318521 | ATGGCGGATC | AGCTTACTGA | TGACCAGATC | TCTGAGTTCA | AAGAGGCTTT |
| FsX97612   | ATGGCAGACC | AACTCACCGA | CGACCAGATC | TCTGAGTTCA | AGGAGGCCTT |
| BnAF150059 | ATGGCAGACC | AACTCACCGA | CGACCAGATC | TCTGAGTTCA | AGGAGGCCTT |
| MtAF494219 | ATGGCAGATC | AACTCACAGA | CGATCAGATC | TCTGAGTTCA | AGGAAGCTTT |
| PsU13882   | ATGGCAGATC | AACTCACAGA | CGATCAGATC | TCTGAGTTTA | AGGAAGCTTT |
| VrL20507   | ATGGCCGATC | AACTCACCGA | CGAGCAGATC | TCCGAGTTTA | AGGAGGCCTT |
| PvAF030032 | ATGGCTGATC | AACTCACCGA | CGAGCAGATC | TCCGAGTTTA | AGGAGGCCTT |
| GmL01432   | ATGGCGGATC | AACTCACCGA | TGAACAGATC | TCCGAGTTCA | AGGAAGCCTT |
| GmL01430   | ATGGCAGATC | AACTCACCGA | TGAACAGATC | TCCGAGTTCA | AGGAAGCCTT |
| AhAY517931 | ATGGCGGATC | CGCTCACCGA | CGAACAGATC | TCTGAATTCA | AGGAAGCCTT |
| MdX60738   | ATGGCGGATC | AGCTGACTGA | CGATCAGATC | TCTGAGTTCA | AGGAGGCCTT |
| VvAY070232 | ATGGCTGATC | AGCTCACCGA | TGACCAGATC | TCCGAGTTCA | AGGAGGCCTT |

|             |            |            |            |            |            |
|-------------|------------|------------|------------|------------|------------|
| BpX89890    | ATGGCCGATC | AGCTAACCGA | TGACCAGATC | TCTGAATTTA | AAGAAGCCTT |
| PpX90560    | ATGGCGGACG | ACTTGACTGA | AGAGCAGATT | GCTGAGTTCA | AGGAGGCGTT |
| MsY13784    | ATGGCCGACC | AGTTGACAGA | GGAGCAGATT | GCAGAGTTTA | AGGAAGCTTT |
| DsU62865    | CCTGCGGACC | AGCTGACAGA | GGACCAGATA | GCGGAATTCa | AGGAGGCATT |
| MtAF494215  | ATGGACGATC | AACTCAATGA | CAAACAAGTT | TCAGAGTTTA | AGAAGGCTTT |
| AtNM_129674 | ATGGCGAATA | AGTTCACTAG | ACAACAGATT | TCAGAGTTTA | GGGAACAGTT |
| MtAF494216  | ATGGCCGATC | AACTCAATCA | CAATCAAATA | TCAAAGATAA | AGGCGTATTT |
| MtAF494218  | ATGATTAATC | CACTTACTGA | TAAACAAATC | TCA.....   | .....      |

51

100

|             |             |            |            |            |            |
|-------------|-------------|------------|------------|------------|------------|
| MtAF494213  | CAGCCTCATC  | GATAAGGATG | GAGATGTTTC | TATTGATAAT | GAAGAACTTG |
| MtAF494214  | CAGCCTCATC  | GATAAGGATG | GAGATGTTTC | TATTGATAAT | GAAGAACTTG |
| MtAF494212  | CAGACTTCTC  | GATAAGGATC | AAGATTTTTT | TATTGATAAT | GATGAACTTC |
| PsU13736    | TGGTTTTGTTT | GACAAAGATG | GAGATGGTTG | CGTTACTGTG | GAAGAATTGG |
| GmL01433    | TGGCTTGTTT  | GACAAAGATG | GAGATGGTTG | CATTACTGTG | GAAGAACTTG |
| GmL19359    | TGGCTTGTTT  | GACAAAGATG | GTGATGGGTG | CATTACTGTG | GACGAATTTG |
| NtAB050849  | CAGTCTATTT  | GACAGAGATG | GAGATGGTTG | TATTACAGTT | GAAGAATTAG |
| AtNM_117546 | TTGTCTCTTC  | GACAAAGACG | GCGACGGTTG | TATAACGGTG | GAAGAACTTG |
| OsAF231026  | CAGCCTCTTC  | GACAAGGACG | GCGACGGTTC | TATCACCACC | AAGGAGCTAG |
| OsNM_191034 | CAGCCTCTTC  | GACAAGGACG | GCGACGGTTC | TATCACCACC | AAGGAGCTAG |
| NtAB050837  | TAGCCTTTTT  | GACAAGGACG | GCGATGGCTG | TATTACTACC | AAGGAATTGG |
| NtAB050838  | TAGCCTTTTT  | GACAAGGACG | GTGATGGCTG | TATTACTACC | AAGGAATTGG |
| StJ04559    | TAGCCTTTTT  | GACAAGGATG | GCGATGGCTG | TATTACTACC | AAGGAGTTGG |
| CaAJ010645  | TAGCCTTTTT  | GACAAGGACG | GCGATGGCTG | TATTACTACC | AAGGAGTTGG |
| PhM80832    | TAGCCTTTTT  | GACAAGGACG | GTGACGGCTG | TATTACTACC | AAGGAGTTGG |
| CsAF334833  | TTCTTTGTTT  | GACAAGGACG | GGGATGGCTG | CATCACTACC | AAAGAGTTGG |
| CrAF510075  | CGGCTTGTTT  | GACAAAGACG | GCGATGGTTG | TATTACTACA | AAGGAACTGG |
| CcAB041712  | CAGTCTTTTT  | GACAAGGATG | GCGATGGGAG | CATCACCACG | AAGGAGCTCG |
| CcAB044286  | CAGTCTTTTT  | GACAAGGATG | GCGATGGGAG | CATCACCACG | AAGGAGCTCG |
| StAF468661  | CAGCCTATTC  | GACAAAGATG | GAGATGGTTG | TATCACAAC  | AAGGAATTGG |
| SrAF474074  | CAGCCTATTC  | GACAAAGATG | GAGATGGTTG | TATCACAAC  | AAGGAATTGG |
| BoAJ427338  | CAGCCTCTTC  | GACAAGGATG | GCGATGGTTG | CATCACCACC | AAGGAGCTCG |
| AtNM_180529 | TAGCCTCTTC  | GATAAGGATG | GTGATGGTTG | TATCACCACC | AAGGAGCTCG |
| AtNM_114249 | TAGCCTATTC  | GACAAAGACG | GAGATGGTTG | TATCACCACA | AAGGAGCTTG |
| BjM88307    | CAGCTTATTC  | GACAAGGATG | GTGACGGTTG | CATTACCACC | AAGGAGCTGG |
| AtNM_115539 | CAGCTTATTC  | GACAAGGATG | GTGATGGTTG | CATTACCACC | AAGGAGCTGG |
| AtNM_180013 | CAGCTTATTC  | GACAAGGATG | GTGATGGTTG | CATTACCACA | AAGGAGCTTG |
| AtNM_123137 | TAGCCTCTTC  | GACAAAGATG | GCGATGGTTG | CATCACAACA | AAAGAGCTGG |
| AtNM_105312 | TAGCCTCTTC  | GACAAAGATG | GAGATGGTTG | CATCACCACA | AAGGAGCTGG |
| AtNM_128261 | TAGCCTTTTT  | GACAAAGACG | GAGATGGTTG | CATCACAACG | AAAGAGCTAG |
| NtAB050848  | CAGCCTTTTT  | GATAAGGATG | GAGATGGTTG | CATCACCAC  | AAGGAGCTTG |
| NtAB050847  | CAGCCTTTTT  | GATAAGGATG | GAGATGGTTG | CATCACCAC  | AAGGAGCTTG |
| StU20296    | CAGCCTTTTT  | GACAAAGACG | GAGATGGTTG | CATCACCAC  | AAAGAGCTTG |
| PhM80836    | TAGCCTTTTT  | GACAAGGATG | GAGATGGTTG | CATCACCAC  | AAGGAGCTTG |
| StU20295    | CAGTCTTTTT  | GACAAGGACG | GAGATGGTTG | TATCACAAC  | AAGGAACTTG |
| ScAJ318520  | CAGTCTTTTT  | GACAAGGACG | GAGATGGTTG | TATCACAAC  | AAGGAACTTG |
| NtAB050841  | TAGTCTCTTT  | GATAAGGACG | GAGATGGTTG | CATCACAAC  | AAGGAGCTTG |
| NtAB050842  | TAGTCTCTTT  | GACAAGGACG | GAGATGGTTG | CATCACAAC  | AAGGAGCTTG |
| NtAB050843  | TAGCCTTTTT  | GACAAGGACG | GCGATGGTTG | CATCACTACG | AAGGAGCTTG |
| NtAB050844  | CAGCCTCTTC  | GACAAGGACG | GCGATGGTTG | CATCACTACT | AAGGAGCTTG |
| PhM80831    | TAGCCTATTC  | GACAAAGATG | GAGATGGTTG | TATCACTACT | AAGGAGCTTG |
| CaX97558    | TAGCCTCTTC  | GATAAGGATG | GAGATGGTTG | CATCACAAC  | AAGGAGCTTG |
| TaU48691    | CAGCCTCTTC  | GACAAGGATG | GGGACGGTTG | CATTACCACC | AAGGAGCTGG |
| TaU48692    | CAGCCTCTTC  | GACAAGGATG | GGGACGGTTG | CATTACCACC | AAGGAGCTGG |
| EgAF295637  | CAGCTTGTTT  | GACAAGGATG | GAGACGGTTG | CATCACAACC | AAGGAACTGG |
| LlL18912    | CAGCCTGTTT  | GATAAGGACG | GCGATGGTTG | CATCACAACC | AAAGAGCTCG |
| LlZ12839    | CAGCCTGTTT  | GATAAGGACG | GCGATGGTTG | CATCACAACC | AAAGAGCTCG |

|            |            |            |            |            |            |
|------------|------------|------------|------------|------------|------------|
| OsAF042839 | CAGCCTCTTC | GACAAGGACG | GCGACGGTTG | CATCACTACT | AAGGAGCTTG |
| OsAF441190 | CAGCCTCTTC | GACAAGGACG | GCGACGGTTG | CATCACTACT | AAGGAGCTTG |
| OsX65016   | CAGCCTCTTC | GACAAGGACG | GCGACGGTTG | CATCACTACT | AAGGAGCTTG |
| ZmAF031482 | CAGCCTCTTC | GATAAGGATG | GCGACGGCTG | CATCACTACC | AAGGAGCTTG |
| ZmX74490   | CAGCCTCTTC | GATAAGGATG | GCGACGGCTG | CATCACTACC | AAGGAGCTTG |
| TaU48242   | CAGCCTCTTC | GACAAGGATG | GAGACGGCTG | CATCACCACC | AAGGAACTTG |
| TaU48688   | CAGCCTCTTC | GACAAGGATG | GAGACGGCTG | CATCACCACC | AAGGAACTTG |
| TaU48689   | CAGCCTCTTC | GACAAGGACG | GAGACGGCTG | CATCACCACC | AAGGAGCTTG |
| ZmX77397   | CAGCCTCTTC | GACAAGGACG | GCGACGGCTG | CATCACCACC | AAGGAACTTG |
| ZmY13974   | CAGCCTCTTC | GATAAGGACG | GCGACGGCTG | CATCACCACC | AAGGAACTTG |
| OsL18913   | CAGCCTCTTC | GACAAGGACG | GCGATGGTTG | CATCACAACC | AAGGAGTTGG |
| OsZ12827   | CAGCCTCTTC | GACAAGGACG | GCGATGGTTG | CATCACAACC | AAGGAGTTGG |
| OsAF441191 | CAGCCTCTTC | GACAAGGACG | GCGATGGTTG | CATCACAACC | AAGGAGTTGG |
| HvM27303   | CAGCCTCTTC | GACAAGGACG | GAGATGGTTG | CATCACCACC | AAGGAGCTGG |
| TaU49104   | CAGCCTCTTC | GACAAGGACG | GAGATGGTTG | CATCACCACC | AAGGAGCTGG |
| TaU46893   | CAGCCTCTTC | GACAAGGACG | GAGATGGTTG | CATCACCACC | AAGGAGCTGG |
| TaU49103   | CAGCCTCTTC | GACAAGGACG | GAGATGGTTG | CATCACCACC | AAGGAGCTGG |
| TaU49105   | CAGCCTATTC | GATAAGGACG | GCGACGGTTG | CATCACAACC | AAGGAGCTGG |
| OsAF042840 | CAGCCTCTTC | GACAAGGACG | GCGATGGTTG | CATCACAACC | AAGGAGCTGG |
| ZmX77396   | CAGCCTCTTC | GACAAGGACG | GCGACGGTTG | CATCACAACC | AAGGAGCTCG |
| MtAF494220 | CAGCCTATTC | GATAAGGATG | GCGATGGTTG | TATTACCACC | AAGGAGCTCG |
| MsX52398   | CAGCCTATTC | GATAAGGATG | GCGATGGTTG | TATTACTACC | AAGGAGCTCG |
| VrS81594   | CAGCCTCTTC | GACAAGGACG | GCGATGGTTG | CATTACTACC | AAGGAACTTG |
| VrL20691   | CAGCCTCTTC | GACAAGGATG | GCGATGGTTG | CATTACTACC | AAGGAACTTG |
| PvAF030034 | CAGCCTCTTC | GACAAGGATG | GCGATGGTTG | CATTACTACC | AAGGAACTTG |
| GmL01431   | CAGCCTCTTC | GACAAGGACG | GCGATGGTTG | TATTACTACT | AAGGAACTTG |
| CaY09853   | CAGTCTCTTC | GATAAGGACG | GCGATGGTTG | TATTACTACC | AAGGAACTTG |
| PvAF030033 | CAGCCTCTTC | GACAAGGACG | GCGATGGTTG | TATTACAACC | AAGGAACTTG |
| AhAY517930 | CAGCCTCTTC | GACAAGGACG | GCGATGGTTG | TATTACTACC | AAGGAACTTG |
| EcAY297816 | CAGCCTCTTC | GACAAGGATG | GCGATGGTTG | TATCACTACT | AAGGAACTCG |
| PaAF292108 | CAGCCTCTTC | GACAAGGACG | GCGATGGTTG | CATCACTACC | AAGGAGCTTG |
| PcAY275526 | CAGCCTATTC | GACAAGGACG | GCGATGGTTG | CATCACTACA | AAGGAGTTGG |
| HaU79736   | CAGCCTCTTC | GACAAGGACG | GCGATGGTTG | TATCACCACC | AAGGAACTTG |
| BdL14071   | CAGCTTGTTT | GACAAGGACG | GCGATGGCTG | CATCACCACC | AAGGAACTGG |
| DcX59751   | CAGCCTGTTC | GACAAGGACG | GCGATGGTTG | CATCACTACC | AAGGAGCTTG |
| DcAY364012 | CAGCCTGTTC | GACAAGGACG | GCGATGGTTG | CATCACTACC | AAGGAGCTTG |
| NtAB050845 | CAGCCTATTC | GACAAGGACG | GCGATGGTTG | CATTACAAC  | AAGGAGCTTG |
| NtAB050846 | CAGCCTTTTC | GACAAGGACG | GCGATGGTTG | CATTACAAC  | AAGGAGCTTG |
| CaU83402   | CAGCCTATTC | GATAAGGACG | GAGATGGTTG | CATTACAAC  | AAGGAGCTTG |
| CaAF108889 | CAGCCTATTC | GATAAGGACG | GAGATGGTTG | CATTACAAC  | AAGGAGCTTG |
| CaX98404   | CAGCCTATTC | GATAAGGACG | GAGATGGTTG | CATTACAAC  | AAGGAGCTTG |
| StU20294   | CAGCCTATTC | GACAAGGACG | GAGATGGTTG | CATTACAAC  | AAGGAGCTTG |
| NtAB050839 | CAGCCTATTT | GACAAGGACG | GAGATGGTTG | CATCACGACT | AAGGAGCTTG |
| NtAB050840 | CAGCCTATTC | GACAAGGACG | GAGATGGTTG | CATCACGACT | AAGGAGCTTG |
| ScAJ318521 | CAGCTTGTTT | GACAAGGACG | GAGATGGTTG | CATCACGACC | AAGGAGCTTG |
| FsX97612   | CAGCTTGTTT | GACAAGGATG | GCGACGGTTG | CATCACTACG | AAGGAACTTG |
| BnAF150059 | CAGCTTGTTT | GACAAGGATG | GCGACGGTTG | CATCACTACC | AAGGAACTTG |
| MtAF494219 | CAGCTTATTC | GACAAGGATG | GCGATGGTTG | CATCACAACC | AAGGAGCTTG |
| PsU13882   | CAGCCTATTC | GATAAGGATG | GCGATGGTTG | CATCACAACC | AAGGAGCTTG |
| VrL20507   | TAGCTTGTTT | GACAAGGACG | GCGATGGTTG | TATCACAAC  | AAGGAGCTCG |
| PvAF030032 | TAGCTTGTTT | GATAAGGACG | GCGATGGTTG | TATCACAAC  | AAAGAGCTTG |
| GmL01432   | CAGCTTGTTT | GATAAGGACG | GCGATGGTTG | CATCACAACC | AAGGAGCTTG |
| GmL01430   | CAGTTTGTTT | GATAAGGATG | GCGATGGTTG | CATCACAACA | AAGGAGCTTG |
| AhAY517931 | CAGCTTGCTC | GATAAGGACG | GCGATGGTTG | CATCACGACC | AAGGAGCTTG |
| MdX60738   | CAGCCTTTTC | GACAAGGATG | GCGATGGTTG | TATCACCACA | AAGGAGCTTG |
| VvAY070232 | CAGCTTGTTT | GACAAAGATG | GAGATGGTTG | TATCGCTACC | AAGGAGCTAG |
| BpX89890   | CAGCCTCTTC | GATAAGGATG | GCGATGGTTG | TATCACAACA | AAGGAACTTG |

|             |            |            |            |            |            |
|-------------|------------|------------|------------|------------|------------|
| PpX90560    | CAGTTTATTT | GACAAGGATG | GCGATGGTAG | CATCACGACC | AAGGAGCTGG |
| MsY13784    | CAGTCTATTC | GACAAAGATG | GTGACGGTAG | CATCACTACC | AAGGAACTTG |
| DsU62865    | TGCGCTATTT | GACAAGGATG | GAGATGGCAC | CATCACAACG | AAAGAGCTGG |
| MtAF494215  | CAACCTCTTC | GATAAGGATG | GAGATGGTTG | TATTTCTGCC | AAGGAATTTG |
| AtNM_129674 | CAGCGTATAC | GACAAGAATG | GTGATGGTCA | CATTACCACA | GAGGAGTTCC |
| MtAF494216  | CAGCCTCATC | GATAAGGATG | AAGATGGTTT | TATTGATAAT | GAA.....   |
| MtAF494218  | ....GCTTTT | GACAAGGACC | AAGATGGT.. | .....      | .....      |

101

150

|             |            |             |             |            |            |
|-------------|------------|-------------|-------------|------------|------------|
| MtAF494213  | ACACTCTAAT | ACGGTCTACT  | GGCCTAAACC  | CAACTGATTT | CGGCTTGATG |
| MtAF494214  | ACACTCTAAT | ACGGTCTACT  | GGCCTAAACC  | CAACTGATTT | CGGCTTGATG |
| MtAF494212  | ACACTCTAAT | ACGGTCGCTT  | GGCCTAAACC  | CAACGTTTTT | CGGCCTGATG |
| PsU13736    | CCACTGTTAT | TAGGTCACTG  | GATCAGAATC  | CCACTGAGGA | AGAGCTACAA |
| GmL01433    | CCACTGTCAT | TCGGTCATTG  | GATCAGAACC  | CCACTGAAGA | AGAGCTCCAA |
| GmL19359    | TCACGGTTAT | CCGGTCATTG  | GTTTCAAGACC | CCACAGAAGA | AGAGCTCCAA |
| NtAB050849  | CGACAGTTAT | AAGGTCATTG  | GATCAAAATC  | CAACAGAGGA | AGAGCTGCAG |
| AtNM_117546 | CAACAGTGAT | CCGTTTCGTTG | GATCAGAATC  | CGACAGAACA | AGAACTTCAT |
| OsAF231026  | GAACCGTGAT | GCGAAGTCTG  | GGGCAGAACC  | CAACAGAGGC | GGAGCTGCAG |
| OsNM_191034 | GAACCGTGAT | GCGAAGTCTA  | GGGCAGAACC  | CAACGGAGGC | GGAGCTGCAG |
| NtAB050837  | GAACAGTGAT | GAGATCACTT  | GGTCAGAATC  | CCACTGAAGC | TGAACTACAG |
| NtAB050838  | GAACAGTGAT | GAGATCACTT  | GGTCAGAATC  | CCACTGAAGC | TGAACTACAG |
| StJ04559    | GAACAGTGAT | GAGATCACTT  | GGTCAGAATC  | CCACTGAAGC | TGAACTACAG |
| CaAJ010645  | GAACAGTGAT | GAGATCACTT  | GGTCAGAATC  | CCACTGAAGC | TGAACTACAG |
| PhM80832    | GAACAGTGAT | GAGATCACTT  | GGTCAGAATC  | CCACTGAAGC | TGAACTTCAG |
| CsAF334833  | GAACAGTCAT | GAGATCTTTG  | GGACAGAATC  | CCACTGAAGC | TGAACTACAG |
| CrAF510075  | GGACTGTGAT | GCGGTCTCTT  | GGCCAGAATC  | CAACCGAGGC | TGAGTTGCAG |
| CcAB041712  | GGACTGTGAT | GAGGTCTCTC  | GGTCAGAATC  | CTACGGAGGC | TGAGCTGCAG |
| CcAB044286  | GGACTGTGAT | GAGGTCTCTC  | GGTCAGAATC  | CTACGGAGGC | TGAGCTGCAG |
| StAF468661  | GAACAGTTAT | GAGATCAATTG | GGACAGAATC  | CAACAGAAGC | TGAACTGCAA |
| SrAF474074  | GAACAGTTAT | GAGATCAATTG | GGACAGAATC  | CAACAGAAGC | TGAACTGCAA |
| BoAJ427338  | GAACCGTGAT | GAGGTCTCTG  | GGGCAAAACC  | CGACAGAAGC | CGAGCTCCAA |
| AtNM_180529 | GAACCGTGAT | GAGGTCTCTG  | GGGCAAAACC  | CAACAGAAGC | TGAGCTTCAA |
| AtNM_114249 | GGACTGTGAT | GAGATCACTT  | GGGCAGAACC  | CGACAGAAGC | CGAGCTCCAG |
| BjM88307    | GAACGTGAT  | GCGTTCCTTA  | GGACAGAACC  | CAACCGAAGC | AGAGCTTCAA |
| AtNM_115539 | GTACTGTGAT | GCGTTCCTT   | GGACAAAACC  | CAACCGAAGC | AGAGCTTCAA |
| AtNM_180013 | GTACCGTGAT | GCGTTCCTC   | GGTCAAAACC  | CAACCGAAGC | TGAGCTTCAA |
| AtNM_123137 | GAACAGTTAT | GCGTTCCTA   | GGACAAAACC  | CAACAGAGGC | TGAGCTCCAA |
| AtNM_105312 | GAACAGTGAT | GCGGTCACTA  | GGGCAGAACC  | CAACAGAAGC | TGAGCTACAA |
| AtNM_128261 | GAACAGTGAT | GAGATCATTG  | GGTCAAAATC  | CAACAGAAGC | AGAGTTACAA |
| NtAB050848  | GGACAGTGAT | GCGGTCTGTTG | GGACAAAATC  | CAACTGAGGC | TGAGCTTCAA |
| NtAB050847  | GGACAGTGAT | GCGGTCTGTTG | GGACAAAATC  | CAACTGAGGC | TGAGCTTCAA |
| StU20296    | GAACGTGAT  | GCGTTCCTT   | GGACAAAACC  | CAACTGAGGC | TGAGCTTCAA |
| PhM80836    | GAACGTGAT  | GCGGTCTGTTG | GGACAAAATC  | CAACTGAGGC | TGAGCTTCAA |
| StU20295    | GAACGTGAT  | GCGGTCTGTTG | GGACAAAATC  | CAACTGAGGC | TGAGCTTCAA |
| ScAJ318520  | GAACGTGAT  | GCGGTCTGTTG | GGACAAAATC  | CAACTGAGGC | TGAGCTTCAA |
| NtAB050841  | GAACGTGAT  | GCGGTCTGTTG | GGACAAAATC  | CAACTGAGGC | TGAGCTTCAA |
| NtAB050842  | GAACGTGAT  | GCGGTCTGTTG | GGACAAAATC  | CAACTGAGGC | TGAGCTTCAA |
| NtAB050843  | GAACGTGAT  | GCGGTCTGTTG | GGACAAAATC  | CAACTGAGGC | TGAGCTTCAA |
| NtAB050844  | GAACGTGAT  | GCGGTCTGTTG | GGACAAAATC  | CAACTGAGGC | TGAGCTTCAA |
| PhM80831    | GAACGTGAT  | GCGGTCTGTTG | GGACAAAATC  | CAACTGAGGC | TGAGCTTCAA |
| CaX97558    | GAACGTGAT  | GCGGTCTGTTG | GGACAAAATC  | CAACTGAGGC | TGAGCTTCAA |
| TaU48691    | GAACGTGAT  | GCGGTCTGTTG | GGACAAAATC  | CAACTGAGGC | TGAGCTTCAA |
| TaU48692    | GAACGTGAT  | GCGGTCTGTTG | GGACAAAATC  | CAACTGAGGC | TGAGCTTCAA |
| EgAF295637  | GAACGTGAT  | GCGGTCTGTTG | GGACAAAATC  | CAACTGAGGC | TGAGCTTCAA |
| LlL18912    | GGACCGTTAT | GCGTTCCTT   | GGACAAAACC  | CAACAGAGGC | AGAGCTCCAG |
| LlZ12839    | GGACCGTTAT | GCGTTCCTT   | GGACAAAACC  | CAACAGAGGC | AGAGCTCCAG |
| OsAF042839  | GAACCGTGAT | GCGGTCTGTTG | GGACAAAATC  | CAACTGAGGC | GGAGCTGCAG |

|            |             |            |            |            |            |
|------------|-------------|------------|------------|------------|------------|
| OsAF441190 | GAACCGTGAT  | GCGGTCCCTT | GGTCAGAACC | CAACTGAGGC | GGAGCTGCAG |
| OsX65016   | GAACTGTGAT  | GCGGTCCCTT | GGTCAGAACC | CAACTGAGGC | TGAGCTCCAG |
| ZmAF031482 | GAACTGTGAT  | GCGCTCCCTT | GGCCAGAACC | CCACTGAAGC | AGAGCTGCAG |
| ZmX74490   | GAACGGTGAT  | GCGCTCCCTT | GGCCAGAACC | CTACCGAGGC | AGAGCTGCAG |
| TaU48242   | GAACTGTGAT  | GCGCTCGCTG | GGGCAGAACC | CCACTGAGGC | AGAGCTTCAG |
| TaU48688   | GAACTGTGAT  | GCGCTCGCTG | GGGCAGAACC | CCACTGAGGC | AGAGCTTCAG |
| TaU48689   | GAACTGTGAT  | GCGCTCGCTG | GGGCAGAACC | CCACTGAGGC | AGAGCTTCAG |
| ZmX77397   | GCACTGTGAT  | GCGCTCATTG | GGGCAGAACC | CTACTGAGGC | TGAGCTTCAG |
| ZmY13974   | GAACTGTGAT  | GCGCTCGTTG | GGCCAGAACC | CTACTGAGGC | TGAGCTTCAG |
| OsL18913   | GAACTGTGAT  | GCGTTCACTA | GGGCAGAACC | CAACGGAAGC | TGAGCTCCAG |
| OsZ12827   | GAACTGTCAT  | GCGTTCACTA | GGGCAGAACC | CAACGGAAGC | TGAGCTCCAG |
| OsAF441191 | GAACTGTCAT  | GCGTTCACTA | GGGCAGAACC | CAACGGAAGC | TGAGCTCCAG |
| HvM27303   | GAACAGTCAT  | GCGCTCGCTG | GGGCAGAACC | CAACGGAGGC | TGAGCTCCAG |
| TaU49104   | GAACAGTCAT  | GCGTTCGCTG | GGGCAGAACC | CAACGGAGGC | TGAGCTCCAG |
| TaU46893   | GAACAGTCAT  | GCGTTCGCTG | GGGCAGAACC | CAACGGAGGC | TGAGCTCCAG |
| TaU49103   | GAACAGTTAT  | GCGTTCGCTG | GGGCAGAACC | CAACGGAGGC | TGAGCTCCAG |
| TaU49105   | GAACAGTGAT  | GCGTTCGCTG | GGGCAGAACC | CAACGGAGGC | AGAGCTCCAG |
| OsAF042840 | GAACCGTGAT  | GCGTTCGCTG | GGGCAGAACC | CAACGGAGGC | CGAGCTCCAG |
| ZmX77396   | GAACTGTCAT  | GCGATCACTG | GGTCAGAACC | CAACCGAGGC | TGAGCTCCAG |
| MtAF494220 | GGACTGTAAT  | GAGGTCACTA | GGCCAGAACC | CAACTGAGGC | TGAATTGCAG |
| MsX52398   | GGACTGTGAT  | GAGGTCGCTA | GGCCAGAACC | CAACTGAGGC | TGAATTGCAG |
| VrS81594   | GGACTGTAAT  | GCGGTCACTT | GGGCAAAACC | CAACTGAGGC | AGAGTTGCAG |
| VrL20691   | GGACTGTAAT  | GCGGTCACTT | GGGCAAAACC | CAACTGAGGC | AGAGTTGCAG |
| PvAF030034 | GGACTGTAAT  | GAGGTCACTT | GGGCAAAATC | CAACTGAGGC | AGAGCTGCAG |
| GmL01431   | GGACTGTAAT  | GCGGTCACTA | GGGCAAAACC | CAACTGAGGC | AGAACTGCAG |
| CaY09853   | GAACTGTAAT  | GCGGTCTCTT | GGGCAAAACC | CAACTGAGGC | AGAGCTGCAG |
| PvAF030033 | GAACCGTGAT  | GAGGTCACTT | GGGCAAAACC | CAACTGAGGC | TGAGCTGCAG |
| AhAY517930 | GTACCGTGCAT | GCGGTCGCTT | GGGCAGAACC | CCACTGAGGC | AGAACTTCAG |
| EcAY297816 | GGACTGTGAT  | GAGATCGTTG | GGTCAGAATC | CAACTGAAGC | AGAGTACAA  |
| PaAF292108 | GGACTGTCAT  | GCGCTCACTT | GGTCAGAACC | CAACTGAAGC | TGAGCTTCAG |
| PcAY275526 | GGACTGTCAT  | GCGTTCACTT | GGGCAGAACC | CAACTGAAGC | CGAGCTTCAG |
| HaU79736   | GAACTGTGAT  | GAGATCTCTT | GGGCAAAACC | CGACCGAAGC | TGAGCTTCAA |
| BdL14071   | GGACTGTTAT  | GCGGTCACTG | GGGCAGAATC | CAACCGAAGC | TGAGCTGCAG |
| DcX59751   | GGACTGTCAT  | GAGGTCGCTT | GGACAGAACC | CTACTGAGGC | TGAACTACAG |
| DcAY364012 | GGACTGTCAT  | GAGGTCGCTT | GGACAGAACC | CTACTGAGGC | TGAACTACAG |
| NtAB050845 | GGACTGTGAT  | GAGGTCATTG | GGACAGAACC | CAACTGAAGC | TGAGCTCCAG |
| NtAB050846 | GGACTGTGAT  | GAGGTCATTG | GGACAGAACC | CAACTGAAGC | TGAGCTCCAG |
| CaU83402   | GGACTGTGAT  | GAGGTCGTTG | GGACAGAATC | CAACTGAAGC | TGAGCTCCAG |
| CaAF108889 | GGACTGTGAT  | GAGGTCGTTG | GGACAGAATC | CAACTGAAGC | TGAGCTCCAG |
| CaX98404   | GGACTGTGAT  | GAGGTCGTTG | GGACAGAATC | CAACTGAAGC | TGAGCTCCAG |
| StU20294   | GGACTGTGAT  | GAGGTCGTTG | GGACAGAACC | CAACTGAAGC | TGAGCTCCAG |
| NtAB050839 | GGACTGTGAT  | GAGGTCGCTG | GGACAGAACC | CCACTGAAGC | AGAGCTCCAA |
| NtAB050840 | GGACTGTGAT  | GAGGTCGCTC | GGACAGAACC | CCACCGAAGC | AGAGCTCCAA |
| ScAJ318521 | GGACTGTGAT  | GAGGTCCTTG | GGACAGAACC | CTACTGAATC | TGAGCTCCAG |
| FsX97612   | GCACTGTGAT  | GAGGTCCTTG | GGCCAGAACC | CAACTGAGGC | AGAGCTGCAG |
| BnAF150059 | GGACTGTGAT  | GAGGTCCTTG | GGCCAGAACC | CAACTGAGGC | AGAGCTGCAG |
| MtAF494219 | GAACTGTTAT  | GCGTTCATTG | GGGCAAAACC | CAACTGAGGC | AGAGCTTCAG |
| PsU13882   | GAACTGTTAT  | GCGATCATTG | GGACAAAACC | CAACTGAAGC | AGAGCTTCAG |
| VrL20507   | GAACTGTTAT  | GCGTTCATTG | GGGCAAAACC | CAACTGAGGC | AGAACTCCAG |
| PvAF030032 | GAACTGTTAT  | GCGTTCATTG | GGGCAAAACC | CAACTGAGGC | AGAGCTCCAG |
| GmL01432   | GAACTGTTAT  | GCGTTCATTG | GGGCAAAACC | CAACTGAGGC | AGAACTCCAG |
| GmL01430   | GGACTGTTAT  | GCGTTCGTTG | GGTCAGAATC | CAACAGAGGC | TGAGCTCCAA |
| AhAY517931 | GAGCTGTTAC  | GCGGTCGCTA | GGACAGAACC | CAACCGAGGC | AGAGCTCCAA |
| MdX60738   | GCACTGTCAT  | GAGATCATTG | GGGCAGAACC | CGACTGAGGC | TGAGCTCCAG |
| VvAY070232 | GGACAGTGAT  | GAGGTCACTG | GGGCAAAATC | CAACTGAGGC | AGAGCTCCAG |
| BpX89890   | GGACGGTGAT  | GAGATCACTT | GGGCAAAATC | CAACCGAAGC | AGAATTGCAA |
| PpX90560   | GAACAGTAAT  | GCGGTCGCTG | GGTCAGAATC | CCACCGAGGC | AGAGTTGCAG |



|             |            |            |            |            |            |
|-------------|------------|------------|------------|------------|------------|
| MsY13784    | GTACGGTGAT | GAGATCCTTG | GGACAGAACC | CGACTGAAGC | TGAACTCCAA |
| DsU62865    | GCACTGTCAT | GCGTTCCTTG | GACCAAAACC | CTACGGAGGC | GGAGCTGCAA |
| MtAF494215  | GGACTCTAAT | GTGGTCGCTC | GGCCAGAACC | CAACTGAGTT | CGACTTGCTG |
| AtNM_129674 | GTGCCGTGAT | GCGTTCCTTC | GGTTTAAACC | TGACCCAAGC | TGAGCTTCAG |
| MtAF494216  | .....      | .....      | .....      | .....      | .....      |
| MtAF494218  | .....      | .....      | .....      | .....      | .....      |

151

200

|             |            |            |            |            |             |
|-------------|------------|------------|------------|------------|-------------|
| MtAF494213  | GTAGCGAGGA | GTAAGTCTGC | CACTGACGGA | AATGGTACCA | TTGATTTCC.. |
| MtAF494214  | GTAGCGAGGA | ATAAGTCTGC | CACTGACGGA | AATGGTACCA | TTGACTTC..  |
| MtAF494212  | GTAGCAATGA | ATAAGTTTGA | CGCTGACGGA | AATGGTACCA | TTGATTTCC.. |
| PsU13736    | GATATGATAA | GTGAAGTTGA | TGCAGATGGC | AATGGAACCA | TTGAATTTGA  |
| GmL01433    | GATATGATAA | GCGAAGTCGA | TGCAGATGGC | AATGGAACCA | TTGAATTTGA  |
| GmL19359    | GACATGATAA | ACGAGGTAGA | TGCAGATGGT | AATGGAACCA | TTGAATTTGT  |
| NtAB050849  | GATATGATCA | CTGAAGTTGA | TTCAGATGGG | AATGGAACCA | TTGAATTCAC  |
| AtNM_117546 | GATATCATCA | CTGAGATTGA | TTCTGATAGC | AACGGCACCA | TTGAATTTGC  |
| OsAF231026  | GACATGATCA | GCGAGGTGGA | CGCGGACAGC | AACGGCAACA | TCGAATTCAA  |
| OsNM_191034 | GACATGATCA | GCGAGGTGGA | CACGGACAGC | AACGGCAACA | TCGAATTCAA  |
| NtAB050837  | GATATGATCA | GCGAGGTTGA | TGCTGATCAG | AATGGAACCA | TTGATTTTCC  |
| NtAB050838  | GATATGATCA | GCGAGGTTGA | TGCTGATCAG | AATGGAACCA | TTGATTTTCC  |
| StJ04559    | GATATGATCA | GTGAAGCTGA | TGCTGATCAG | AATGGAACCA | TTGATTTTCC  |
| CaAJ010645  | GATATGATCA | GTGAAGTTGA | TGCTGATCAG | AATGGAACCA | TTGATTTTCC  |
| PhM80832    | GATATGATCA | GCGAAGTTGA | TGCTGATCAG | AATGGAACCA | TTGATTTTCC  |
| CsAF334833  | GACATGATCA | ATGAAGTTGA | TGCTGATCAA | AATGGCACTA | TTGATTTTTC  |
| CrAF510075  | GAAATGATCA | ATGAAGTTGA | TGCAGATGGG | AACGGGACAA | TTGATTTTCC  |
| CcAB041712  | GATATGATCA | ATGAGGTTGA | CGTTGATGGG | AACGGAACCA | TCGATTTCCA  |
| CcAB044286  | GATATGATCA | ATGAGGTTGA | CGTTGATGGG | AACGGAACCA | TCGATTTCCA  |
| StAF468661  | GACATGATCA | ATGAGGTTGA | TGCTGATGGA | AATGGGACAA | TTGATTTTCC  |
| SrAF474074  | GATATGATCA | ATGAGGTTGA | TGCTGATGGA | AATGGGACAA | TTGATTTTCC  |
| BoAJ427338  | GACATGATCA | ACGAAGTTGA | CGCTGACGGG | AACGGGACCA | TCGACTTCCC  |
| AtNM_180529 | GACATGATCA | ATGAAGTTGA | TGCAGATGGG | AACGGGACCA | TTGATTTCCC  |
| AtNM_114249 | GACATGATCA | ACGAAGTTGA | TGCAGACGGG | AACGGGACAA | TAGATTTCCC  |
| BjM88307    | GACATGATCA | ATGAAGTTGA | CGCTGATGGT | AACGGCACTA | TAGATTTCCC  |
| AtNM_115539 | GACATGATCA | ACGAAGTTGA | TGCTGATGGT | AACGGTACCA | TTGATTTCCC  |
| AtNM_180013 | GACATGATCA | ACGAAGTTGA | TGCGGATGGT | AACGGAACCA | TTGATTTCCC  |
| AtNM_123137 | GACATGATCA | ACGAGGTTGA | TGCAGATGGA | AACGGCACTA | TAGACTTCCC  |
| AtNM_105312 | GACATGATCA | ACGAGGTTGA | CGCTGATGGA | AACGGAACCA | TTGACTTCCC  |
| AtNM_128261 | GATATGATAA | ACGAAGTAGA | TGCTGATGGT | AACGGAACCA | TAGACTTCCC  |
| NtAB050848  | GACATGATCA | ACGAAGTAGA | TGCTGATGGA | AATGGAACCA | TAGACTTCCC  |
| NtAB050847  | GACATGATCA | ATGAAGTAGA | TGCTGATGGA | AATGGAACCA | TTGATTTCCC  |
| StU20296    | GACATGATCA | ATGAAGTTGA | TGCTGATGGA | AATGGAACCA | TTGACTTCCC  |
| PhM80836    | GACATGATCA | ATGAAGTTGA | TGCTGATGGA | AATGGAACCA | TTGACTTCCC  |
| StU20295    | GACATGATCA | ATGAAGTTGA | TGCTGATGGA | AATGGGACCA | TTGATTTTCC  |
| ScAJ318520  | GACATGATCA | ATGAAGTTGA | TGCTGATGGA | AATGGGACCA | TTGATTTTCC  |
| NtAB050841  | GACATGATCA | ATGAAGTTGA | TGCTGACGGG | AATGGGACCA | TTGATTTCCC  |
| NtAB050842  | GACATGATTA | ATGAAGTTGA | TGCTGATGGG | AATGGGACCA | TTGATTTCCC  |
| NtAB050843  | GATATGATCA | ACGAAGTCGA | TGCTGATGGG | AATGGAACCA | TTGACTTCCC  |
| NtAB050844  | GATATGATCA | ATGAAGTCGA | TGCTGATGGG | AATGGGACCA | TTGACTTCCC  |
| PhM80831    | GACATGATTA | ATGAAGTTGA | TGCTGATGGG | AATGGGACCA | TTGACTTCCC  |
| CaX97558    | GACATGATCA | ACGAAGTTGA | TGCCGATGGG | AATGGGACCA | TAGACTTCCC  |
| TaU48691    | GACATGATCA | ATGAGGTGGA | TGCTGACGGC | AATGGAACAA | TTGATTTCCC  |
| TaU48692    | GACATGATCA | ATGAGGTGGA | TGCTGACGGC | AATGGAACAA | TTGATTTCCC  |
| EgAF295637  | GACATGATCA | ATGAGGTGGA | TGCAGATGGC | AATGGTACAA | TAGACTTCCC  |
| LlL18912    | GACATGATCA | ATGAGGTAGA | TGCTGACGGC | AATGGGACCA | TTGATTTCCC  |
| LlZ12839    | GACATGATCA | ATGAGGTAGA | TGCTGACGGC | AATGGGACCA | TTGATTTCCC  |
| OsAF042839  | GACATGATCA | ACGAGGTTGA | TGCTGATGGC | AATGGGACCA | TTGACTTCCC  |
| OsAF441190  | GACATGATCA | ACGAGGTTGA | TGCTGATGGC | AATGGGACCA | TTGATTTCCC  |

|            |            |            |            |            |            |
|------------|------------|------------|------------|------------|------------|
| OsX65016   | GACATGATCA | ACGAGGTTGA | TGCTGATGGC | AATGGGACCA | TTGACTTCCC |
| ZmAF031482 | GACATGATCA | ACGAGGTTGA | TGCTGATGGC | AATGGGACCA | TTGACTTCCC |
| ZmX74490   | GACATGATCA | ACGAGGTCGA | TGCGGATGGC | AATGGGACCA | TCGACTTCCC |
| TaU48242   | GATATGATCA | ATGAAGTGGA | TGCTGATGGC | AATGGAACGA | TTGACTTTCC |
| TaU48688   | GATATGATCA | ATGAAGTGGA | TGCTGATGGC | AATGGAACGA | TTGACTTTCC |
| TaU48689   | GATATGATCA | ATGAAGTGGA | TGCTGATGGC | AATGGAACGA | TTGACTTTCC |
| ZmX77397   | GACATGATCA | ATGAGGTTGA | TGCTGATGGC | AATGGAACCA | TCGACTTTCC |
| ZmY13974   | GACATGATCA | ACGAGGTAGA | TGCTGATGGC | AATGGAACCA | TCGACTTCCC |
| OsL18913   | GACATGATCA | ACGAGGTTGA | TGCTGATGGC | AATGGAACCA | TTGATTTTCC |
| OsZ12827   | GACATGATCA | ACGAGGTTGA | TGCTGATGGC | AATGGAACCA | TTGATTTTCC |
| OsAF441191 | GACATGATCA | ACGAGGTTGA | TGCTGATGGC | AATGGAACCA | TTGATTTTCC |
| HvM27303   | GACATGATCA | ATGAAGTCGA | CGCTGATGGC | AACGGCACCA | TTGACTTCCC |
| TaU49104   | GACATGATCA | ATGAAGTCGA | CGCTGATGGC | AACGGCACCA | TTGACTTCCC |
| TaU46893   | GACATGATCA | ATGAAGTCGA | CGCTGATGGC | AATGGCACCA | TTGACTTCCC |
| TaU49103   | GACATGATCA | ATGAAGTCGA | TGCTGATGGC | AACGGCACCA | TTGACTTCCC |
| TaU49105   | GACATGATCA | ACGAGGTGGA | CGCGGACGGC | AACGGCACCA | TCGACTTCCC |
| OsAF042840 | GACATGATCA | ACGAGGTCGA | CGCGGACGGC | AACGGCACCA | TCGACTTCCC |
| ZmX77396   | GACATGATCA | ACGAGGTCGA | TGCGGACGGC | AACGGCACCA | TCGACTTCCC |
| MtAF494220 | GACATGATCA | ACGAGGTTGA | TGCTGATGGA | AACGGTACCA | TTGATTTCCC |
| MsX52398   | GACATGATCA | ACGAGGTTGA | TGCTGATGGA | AACGGTACCA | TTGATTTCCC |
| VrS81594   | GACATGATAA | ATGAGGTTGA | TGCTGATGGC | AACGGAACCA | TCGATTTCCC |
| VrL20691   | GACATGATAA | ATGAGGTTGA | TGCTGATGGC | AACGGAACCA | TCGATTTCCC |
| PvAF030034 | GACATGATAA | ATGAGGTTGA | TGCTGATGGC | AACGGAACTA | TCGATTTCCC |
| GmL01431   | GATATGATTA | ATGAGGTTGA | TGCTGATGGC | AATGGAACCA | TCGACTTCCC |
| CaY09853   | GACATGATAA | ATGAAGTCGA | TGCTGATGGA | AATGGTACCA | TTGATTTCCC |
| PvAF030033 | GACATGATAA | ACGAGGTTGA | TGCTGATGGG | AATGGTACCA | TTGATTTCCC |
| AhAY517930 | GACATGATTA | ATGAGGTTGA | TGCCGATGGC | AATGGTACTA | TTGATTTCCC |
| EcAY297816 | GACATGATAA | ACGAGGTTGA | TGCTGATGGA | AATGGCACCA | TCGATTTCCC |
| PaAF292108 | GATATGATCA | ATGAGGTTGA | TGCTGACGGG | AATGGAACCA | TTGATTTCCC |
| PcAY275526 | GATATGATCA | ATGAGGTTGA | TGCTGATGGG | AATGGGACCA | TTGATTTTCC |
| HaU79736   | GATATGATCA | ATGAGGTGGA | TGCTGATGGG | AACGGGACGA | TTGATTTCCC |
| BdL14071   | GACATGATCA | ATGAAGTTGA | TGCTGATGGA | AATGGAACCA | TTGATTTTCC |
| DcX59751   | GATATGATAA | ATGAAGTGGA | TGCTGATGGT | AATGGAACTA | TTGACTTTCC |
| DcAY364012 | GATATGATAA | ATGAAGTGGA | TGCTGATGGT | AATGGAACTA | TTGACTTTCC |
| NtAB050845 | GACATGATAA | ATGAAGTGGA | TGCTGATGGT | AATGGAACCA | TTGACTTCCC |
| NtAB050846 | GACATGATAA | ATGAAGTGGA | TGCTGATGGT | AATGGAACCA | TTGACTTCCC |
| CaU83402   | GACATGATAA | ATGAAGTGGA | TGCTGATGGT | AATGGAACCA | TAGACTTCCC |
| CaAF108889 | GACATGATAA | ATGAAGTGGA | TGCTGATGGT | AATGGAACCA | TAGACTTCCC |
| CaX98404   | GACATGATAA | ATGAAGTGGA | TGCTGATGGT | AATGGAACCA | TAGACTTCCC |
| StU20294   | GACATGATAA | ATGAAGTGGA | TGCTGATGGT | AATGGAACCA | TCGACTTCCC |
| NtAB050839 | GACATGATAA | ACGAGGTGGA | TGCAGATGGT | AACGGAACCA | TTGACTTCCC |
| NtAB050840 | GACATGATAA | ACGAGGTGGA | TGCAGATGGT | AACGGAACCA | TTGACTTCCC |
| ScAJ318521 | GACATGATAA | ACGAGGTGGA | TGCAGATGGT | AATGGAACCA | TCGACTTCCC |
| FsX97612   | GACATGATCA | ACGAAGTTGA | TCGTGATGGT | AATGGAACTA | TTGACTTCCC |
| BnAF150059 | GACATGATCA | ACGAAGTTGA | TGCTGATGGT | AATGGAACTA | TTGACTTCCC |
| MtAF494219 | GACATGATCA | ATGAAGTAGA | TGCTGATGGG | AATGGTACTA | TTGACTTCCC |
| PsU13882   | GACATGATCA | ATGAAGTAGA | TGCTGATGGG | AATGGTACTA | TTGACTTCCC |
| VrL20507   | GACATGATCA | ACGAAGTGGA | TGCTGATGGG | AATGGTACCA | TTGACTTCCC |
| PvAF030032 | GACATGATCA | ACGAAGTGGA | TGCTGATGGG | AATGGTACCA | TTGACTTCCC |
| GmL01432   | GACATGATCA | ATGAAGTGGA | TGCTGATGGG | AATGGTACCA | TTGACTTCCC |
| GmL01430   | GACATGATCA | ATGAAGTAGA | TGCTGATGGG | AATGGCACCA | TTGACTTCCC |
| AhAY517931 | GACATGATCA | ATGAAGTAGA | TGCCGATGGC | AACGGCACCA | TTGACTTCCC |
| MdX60738   | GACATGATCA | ATGAAGTCGA | TGCTGATGGT | AATGGGACCA | TTGACTTTCC |
| VvAY070232 | GATATGATAA | ATGAGGTTGA | TGCTGATGGT | AATGGGACTA | TTGACTTTCC |
| BpX89890   | GACATGATCA | ACGAAGTGGA | TGCAGATGGC | AATGGCACCA | TTGATTTCCC |
| PpX90560   | GACATGATCA | ATGAGGTTGA | TGCCGATGGA | AACGGCACTA | TCGATTTTCC |
| MsY13784   | GACATGATCA | ACGAAGTGGA | TGCAGATGGA | AACGGAACCA | TCGATTTTCC |

|             |            |            |            |            |            |
|-------------|------------|------------|------------|------------|------------|
| DsU62865    | GACACGATTA | ACGAGGTGGA | CGCAGACGGG | AACGGCACCA | TCGACTTCCC |
| MtAF494215  | GCCACGATGA | ATAAGTTCGA | CACTGACGGG | AATAGTGTCA | TTGATTTCTC |
| AtNM_129674 | GAGGAGATCA | ACGATTTCGA | TTTAGATGGT | GACGGAACCA | TCAATTTTCC |
| MtAF494216  | .....      | .....      | .....      | .....      | .....      |
| MtAF494218  | .....      | .....      | .....      | .....      | .....      |

201

250

|             |            |            |             |             |            |
|-------------|------------|------------|-------------|-------------|------------|
| MtAF494213  | .....      | .....      | .....       | .....       | ...ACCAAAG |
| MtAF494214  | .....      | .....      | .....       | .....       | ...ACCAAAG |
| MtAF494212  | .....      | .....      | .....       | .....       | ...ACCGAAG |
| PsU13736    | TGAGTTCCTG | AACTTGATGG | CAAGGAAAAT  | GAAAGACACT  | GATGCAGAAG |
| GmL01433    | CGAGTTCCTG | AGCTTGATGG | CCAAGAAAAT  | TAAAGACACT  | GATGCAGAGG |
| GmL19359    | TGAGTTTTTG | AACTTAATGG | CCAAGAAAAT  | GAAGGAAACT  | GATGAAGAGG |
| NtAB050849  | TGAATTCCTG | AACCTTATGG | CCAAGAAAAT  | GAAGGACACT  | GATGCTGAGG |
| AtNM_117546 | TGAGTTTCTC | AACCTCATGG | CCAAAAAAT   | TCAGGAAAGT  | GATGCGGAGG |
| OsAF231026  | GGAGTTCCTG | GGCCTGATGG | CGCGCAAGCT  | GAGGGACAAG  | GACTCCGAGG |
| OsNM_191034 | GGAGTTCCTG | GGCCTGATGG | CGCGCAAGCT  | GAGGGACAAG  | GACTCCGAGG |
| NtAB050837  | AGAGTTCCTG | AATCTGATGG | CACGTAAGAT  | GAAGGACACT  | GATTCTGAGG |
| NtAB050838  | AGAGTTCCTG | AATCTGATGG | CGCGTAAGAT  | GAAGGACACT  | GATTCTGAGG |
| StJ04559    | AGAGTTCCTG | AATCTGATGG | CACGTAAGAT  | GAAGGACACT  | GATTCTGAGG |
| CaAJ010645  | AGAGTTCCTG | AATCTGATGG | CACGTAAGAT  | GAAGGACACC  | GATTCTGAGG |
| PhM80832    | AGAGTTCCTG | AATCTGATGG | CACGTAAGAT  | GAAGGACACT  | GATTCTGAAG |
| CsAF334833  | TGAGTTTCTG | AATTTGATGG | CACGAAAAT   | GAAGGATACT  | GATTCTGAGG |
| CrAF510075  | GGAGTTTCTT | AACCTAATGG | CCAGGAAAAT  | GAAGGATACA  | GATTCTGAAG |
| CcAB041712  | CGAGTTCCTG | AACCTGATGG | CGAGAAAAGAT | GAAGGACACA  | GACTCCGAGG |
| CcAB044286  | CGAGTTCCTG | AACCTGATGG | CGAGAAAAGAT | GAAGGACACA  | GACTCCGAGG |
| StAF468661  | AGAGTTCCTG | AATTTAATGG | CGAGAAAAGAT | GAAGGATACT  | GATTCTGAGG |
| SrAF474074  | AGAGTTCCTG | AATTTAATGG | CGAGAAAAGAT | GAAGGATACT  | GATTCTGAGG |
| BoAJ427338  | TGAGTTCCTG | AACCTGATGG | CGAGGAAAGAT | GAAGGACACT  | GACTCCGAGG |
| AtNM_180529 | GGAGTTCCTG | AACCTGATGG | CAAGGAAAAT  | GAAGGACACT  | GATTCAGAGG |
| AtNM_114249 | AGAGTTCCTG | AACCTAATGG | CACGTAAGAT  | GAAAGACACT  | GATTCAGAGG |
| BjM88307    | TGAGTTCCTG | AACCTCATGG | CCCGTAAGAT  | GAAGGACACC  | GACTCCGAGG |
| AtNM_115539 | AGAGTTCCTG | AACCTTATGG | CTCGTAAGAT  | GAAGGACACC  | GACTCTGAGG |
| AtNM_180013 | GGAGTTCCTG | AACCTAATGG | CTAGGAAAAT  | GAAGGACACT  | GACTCTGAGG |
| AtNM_123137 | CGAGTTCCTG | AACCTGATGG | CTAAGAAGAT  | GAAAGACACT  | GACTCCGAGG |
| AtNM_105312 | TGAGTTCCTA | AACCTAATGG | CTAAAAAGAT  | GAAGGACACA  | GACTCCGAGG |
| AtNM_128261 | TGAGTTTCTG | AACCTAATGG | CTAGGAAGAT  | GAAGGACACT  | GACTCTGAAG |
| NtAB050848  | CGAGTTCCTT | AACTTGATGG | CTCGCAAGAT  | GAAAGACACT  | GATTCTGAGG |
| NtAB050847  | GGAGTTCCTT | AACCTGATGG | CTCGCAAGAT  | GAAAGACACT  | GATTCTGAGG |
| StU20296    | CGAGTTCCTG | AACTTGATGG | CTCGGAAGAT  | GAAAGACACT  | GATTCTGAGG |
| PhM80836    | AGAATTTCTT | AACCTGATGG | CTCGCAAGAT  | GAAAGATACT  | GATTCTGAGG |
| StU20295    | AGAGTTCCTA | AACCTGATGG | CTCGCAAGAT  | GAAGGACACT  | GATTCTGAGG |
| ScAJ318520  | AGAGTTCCTT | AACCTGATGG | CTCGCAAGAT  | GAAGGACACT  | GATTCTGAGG |
| NtAB050841  | AGAGTTCCTT | AACCTGATGG | CTCGCAAGAT  | GAAGGACACT  | GATTCCGAAG |
| NtAB050842  | AGAGTTCCTT | AACCTGATGG | CTCGCAAGAT  | GAAGGACACT  | GATTCCGAGG |
| NtAB050843  | TGAGTTCCTT | AACTTGATGG | CTCGTAAGAT  | GAAGGACACT  | GATTCTGAGG |
| NtAB050844  | TGAGTTCCTT | AACCTGATGG | CTCGCAAGAT  | GAAGGACACT  | GATTCTGAGG |
| PhM80831    | TGAGTTCCTA | AACCTGATGG | CTCGCAAGAT  | GAAGGACACT  | GATTCTGAGG |
| CaX97558    | TGAGTTCCTT | AACCTGATGG | CTCGCAAGAT  | GAAAGACACT  | GATTCCGAGG |
| TaU48691    | TGAATTCCTC | AACCTTATGG | CCCGCAAGAT  | GAAGGACACT  | GATTCTGAGG |
| TaU48692    | TGAATTCCTC | AACCTTATGG | CCCGCAAGAT  | GAAGGACACT  | GATTCTGAGG |
| EgAF295637  | AGAGTTCCTT | AACCTGATGG | CTCGCAAGAT  | GAAGGACACT  | GATTCAGAGG |
| LlL18912    | AGAATTTCTC | AACTTGATGG | CCCGCAAAAAT | GAAAGACACC  | GACTCAGAGG |
| LlZ12839    | AGAATTTCTC | AACTTGATGG | CCCGCAAAAAT | GAAAGACACC  | GACTCAGAGG |
| OsAF042839  | AGAGTTCCTG | AACCTGATGG | CGAAGAAGAT  | GAAGGATAACC | GACTCTGAGG |
| OsAF441190  | AGAGTTCCTG | AACCTGATGG | CGAAGAAGAT  | GAAGGATAACC | GACTCTGAGG |
| OsX65016    | AGAGTTCCTG | AACCTGATGG | CCCGCAAGAT  | GAAGGATACT  | GACTCTGAGG |

|            |             |            |            |            |            |
|------------|-------------|------------|------------|------------|------------|
| ZmAF031482 | AGAGTTCCTG  | AACCTGATGG | CAAGGAAGAT | GAAGGACACC | GACTCCGAGG |
| ZmX74490   | GGAGCTCCTG  | AACCTGATGG | CGAGGAAGAT | GAAGGACACG | GACTCAGAGG |
| TaU48242   | TGAGTTCCTT  | AACCTGATGG | CACGTAAGAT | GAAAGACACC | GACTCCGAGG |
| TaU48688   | TGAGTTCCTT  | AACCTGATGG | CACGTAAGAT | GAAAGACACC | GACTCCGAGG |
| TaU48689   | TGAGTTCCTC  | AACCTGATGG | CACGTAAGAT | GAAGGACACT | GATTCCGAGG |
| ZmX77397   | TGAGTTTCTC  | AACCTGATGG | CACGCAAGAT | GAAGGACACC | GACTCTGAGG |
| ZmY13974   | TGAGTTTCTC  | AACCTGATGG | CACGCAAGAT | GAAGGACACC | GACTCTGAGG |
| OsL18913   | TGAGTTTCTC  | AATCTGATGG | CTCGCAAGAT | GAAGGACACT | GATTCCGAGG |
| OsZ12827   | TGAGTTTCTC  | AATCTGATGG | CTCGCAAGAT | GAAGGACACT | GATTCCGAGG |
| OsAF441191 | TGAGTTTCTC  | AATCTGATGG | CTCGCAAGAT | GAAGGACACT | GATTCCGAGG |
| HvM27303   | AGAGTTCCTC  | AACCTGATGG | CCCXCAAGAT | GAAGGACACT | GACTCAGAGG |
| TaU49104   | AGAGTTCCTC  | AACCTGATGG | CCCXCAAGAT | GAAGGACACT | GACTCAGAGG |
| TaU46893   | AGAGTTCCTC  | AACCTGATGG | CCCXCAAGAT | GAAGGACACC | GACTCAGAGG |
| TaU49103   | AGAGTTCCTC  | AACCTGATGG | CCCXCAAGAT | GAAGGACACT | GACTCAGAGG |
| TaU49105   | GGAGTTCCTC  | AACCTGATGG | CTCGCAAGAT | GAAGGACACG | GACTCGGAGG |
| OsAF042840 | GGAGTTCCTC  | AACCTGATGG | CACGCAAGAT | GAAGGACACC | GACTCGGAGG |
| ZmX77396   | GGAGTTCCTC  | AACCTCATGG | CCCXCAAGAT | GAAGGACACC | GACTCCGAGG |
| MtAF494220 | TGAATTCCTT  | AACCTGATGG | CCCXCAAGAT | GAAGGATACT | GATTCCGAGG |
| MsX52398   | TGAATTCCTT  | AACCTGATGG | CCCXCAAGAT | GAAGGATACT | GATTCCGAGG |
| VrS81594   | GGAGTTCCTC  | AATCTGATGG | CTCGCAAGAT | GAAAGATACT | GACTCAGAGG |
| VrL20691   | GGAGTTCCTC  | AATCTGATGG | CTCGCAAGAT | GAAAGACACT | GACTCCGAGG |
| PvAF030034 | AGAGTTCCTG  | AACCTGATGG | CTCGCAAGAT | GAAAGACACT | GATTCCGAGG |
| GmL01431   | AGAGTTCCTC  | AACCTGATGG | CTCGCAAGAT | GAAAGACACC | GACTCCGAGG |
| CaY09853   | AGAATTCCTA  | AACCTGATGG | CTCGCAAGAT | GAAAGACACT | GATTCCGAGG |
| PvAF030033 | AGAATTCCTG  | AACCTCATGG | CGCGCAAGAT | GAAAGACACT | GATTCCGAGG |
| AhAY517930 | CGAGTTCCTT  | AACCTGATGG | CTCGCAAAAT | GAAGGATACT | GACTCAGAGG |
| EcAY297816 | AGAGTTCCTT  | AATCTGATGG | CCCXCAAGAT | GAAGGACACT | GATTCTGAGG |
| PaAF292108 | TGAGTTTCTT  | AACCTGATGG | CCAGGAAGAT | GAAGGACACA | GATTCTGAGG |
| PcAY275526 | AGAGTTCCTT  | AACCTGATGG | CCCXCAAGAT | GAAGGACACC | GATTCCGAGG |
| HaU79736   | GGAGTTTCTT  | AACCTGATGG | CACGTAAGAT | GAAGGACACT | GATTCTGAGG |
| BdL14071   | CGAGTTTCTT  | AATCTGATGG | CAAGAAAAAT | GAAGGACACT | GATTCCGAGG |
| DcX59751   | CGAGTTCTTA  | AACCTTATGG | CCAGAAAGAT | GAAGGACACT | GATTCTGAGG |
| DcAY364012 | CGAGTTCTTA  | AACCTTATGG | CCAGAAAGAT | GAAGGACACT | GATTCTGAGG |
| NtAB050845 | AGAGTTTTTTG | AACCTCATGG | CCAGGAAGAT | GAAGGATACA | GACTCCGAGG |
| NtAB050846 | AGAGTTTTTTG | AACCTCATGG | CTAGGAAGAT | GAAGGATACA | GACTCCGAGG |
| CaU83402   | AGAGTTCTTG  | AACCTCATGG | CCAGGAAGAT | GAAGGATACA | GACTCAGAGG |
| CaAF108889 | AGAGTTCTTG  | AACCTCATGG | CCAGGAAGAT | GAAGGATACA | GACTCAGAGG |
| CaX98404   | AGAGTTCTTG  | ATCCTCATGG | CCAGGAAGAT | GAAGGATACA | GACTCAGAGG |
| StU20294   | AGAGTTTTTTG | AACCTCATGG | CGAGGAAGAT | GAAGGATACA | GACTCAGAGG |
| NtAB050839 | TGAGTTTCTA  | AACCTCATGG | CCAGGAAAAT | GAAGGATACT | GACTCCGAGG |
| NtAB050840 | TGAGTTTCTA  | AACCTCATGG | CCAGGAAAAT | GAAGGATACT | GACTCCGAGG |
| ScAJ318521 | AGAGTTTCTA  | AACCTCGTGG | CCAGGAAGAT | GAAGGATACT | GACTCTGAGG |
| FsX97612   | TGAGTTCCTA  | AACCTGATGG | CTAGGAAGAT | GAAGGACACT | GATTCCGAGG |
| BnAF150059 | TGAGTTCCTA  | AACCTGATGG | CTAGGAAGAT | GAAGGACACT | GATTCCGAGG |
| MtAF494219 | CGAGTTTCTT  | AACCTCATGG | CAAGGAAGAT | GAAGGACACC | GACTCTGAGG |
| PsU13882   | CGAGTTTCTC  | AACCTCATGG | CAAGGAAGAT | GAAGGACACC | GACTCTGAGG |
| VrL20507   | TGAGTTTTTA  | AACCTCATGG | CCAGGAAGAT | GAAGGACACT | GATTCTGAGG |
| PvAF030032 | TGAGTTTTTA  | AACCTCATGG | CTAGGAAGAT | GAAGGACACT | GATTCTGAAG |
| GmL01432   | TGAGTTCCTA  | AACCTCATGG | CTAGGAAGAT | GAAGGACACT | GATTCTGAGG |
| GmL01430   | TGAGTTCTTG  | AACCTCATGG | CTAGAAAGAT | GAAGGACACT | GATTCTGAGG |
| AhAY517931 | CGAGTTTCTA  | AACCTTACGG | CCAGGAAGAT | GAAGGACACT | GATTCTGAGG |
| MdX60738   | TGAGTTCTTA  | AACCTCATGG | CCAGGAAGAT | GAAGGACACT | GACTCTGAGG |
| VvAY070232 | TGAGTCTCTA  | AATCTCATGG | CCAGGAAAAT | GAAAGATACT | GATTCCGAGG |
| BpX89890   | GGAGTTTCTA  | AACCTGATGG | CAAGAAAGAT | GAAGGACACC | GACTCTGAAG |
| PpX90560   | CGAGTTTCTA  | AACCTCATGG | CCCXGAAAAT | GAAGGATACC | GACTCTGAGG |
| MsY13784   | TGAGTTTCTC  | AATCTGATGG | CTAGGAAAAT | GAAGGATACT | GATTCTGAAG |
| DsU62865   | TGAGTTTCTC  | ATGCTCATGG | CGCGAAAGAT | GAAGGAGACT | GACCAAGAGG |

|             |            |            |            |            |            |
|-------------|------------|------------|------------|------------|------------|
| MtAF494215  | CGAATTCCTC | AACCTCGCAG | CGCGCATG~~ | ~~~~~      | ~~~~~      |
| AtNM_129674 | TGAGTTCTTG | TGCGCAATGG | CT.....    | .AAGGACACT | TACTCTGAGA |
| MtAF494216  | .....      | .....      | .....      | .....      | .....      |
| MtAF494218  | .....      | .....      | .....      | .....      | .....      |

251

300

|             |            |            |             |            |            |
|-------------|------------|------------|-------------|------------|------------|
| MtAF494213  | AAGAGCTTCT | CATAGTTTTC | TCTAAGCCTG  | ACACGGATCA | TAATGGTTTT |
| MtAF494214  | AAGAGCTTCT | CATAGTTTTC | TCTAAGCCTA  | ACACGGATCA | TAATGGTTTT |
| MtAF494212  | AAGATTTTAT | CATATCTTTT | CCTAAGCCTG  | ACAAGGATCA | TAATGGTTTT |
| PsU13736    | AGGAGCTAAG | AGAGGCTTTT | AAGGTTTTTG  | ATAAAGATCA | AAATGGCTAT |
| GmL01433    | AGGAGCTCAA | AGAAGCTTTT | AAGGTTTTTG  | ACAAAGATCA | AAATGGCTAC |
| GmL19359    | AAGATCTCAA | AGAGGCTTTT | AAGGTGTTTG  | ACAAGGATCA | AAATGGCTAC |
| NtAB050849  | AAGAACTTAA | AGAGGCTTTT | AAGGTGTTTG  | ACAAAGATCA | AAATGGTTAT |
| AtNM_117546 | AAGAGCTGAA | AGAAGCATT  | AAAGTCTTTG  | ACAAAGACCA | AAATGGATAC |
| OsAF231026  | AGGAGCTGAA | GGAGGCGTTC | CGCGTCTTCG  | ACAAGGACCA | GAACGGCTTC |
| OsNM_191034 | AGGAGCTGAA | GGAGGCTTTT | CGCGTCTTCG  | ACAAGGACCA | GAACGGTTTC |
| NtAB050837  | AAGAACTCAA | AGAAGCTTTT | AAGGTTTTTG  | ATAAAGATCA | GAATGGCTTT |
| NtAB050838  | AGGAACTCAA | AGAAGCTTTT | AAGGTTTTTG  | ATAAAGATCA | GAATGGCTTT |
| StJ04559    | AGGAACTCAA | AGAGGCTTTT | AAGGTTTTTG  | ATAAAGATCA | GAATGGCTTT |
| CaAJ010645  | AGGAACTTAA | AGAAGCTTTT | AAGGTTTTTG  | ACAAAGATCA | GAATGGCTTT |
| PhM80832    | AGGAACTTAA | AGAAGCTTTT | AAAGTTTTTG  | ACAAAGATCA | GAATGGATAT |
| CsAF334833  | AGGAACTCAA | AGAAGCTTTT | AAGGTGTTTG  | ATAAGGACCA | GAATGGCTTT |
| CrAF510075  | AGGAGCTCAA | AGAGGCTTTT | AAAGTCTTTG  | ATAAAGACCA | GAATGGATTT |
| CcAB041712  | AGGAACTTAA | AGAAGCCTTT | AAGGTTTTTG  | ACAAAGACCA | GAACGGATAC |
| CcAB044286  | AGGAACTTAA | AGAAGCCTTT | AAGGTTTTTG  | ACAAAGACCA | GAACGGATAC |
| StAF468661  | AAGAACTTAA | AGAAGCTTTT | CGTGTGTTTG  | ACAAAGATCA | AAATGGCTTC |
| SrAF474074  | AAGAACTTAA | AGAAGCTTTT | CGTGTGTTTG  | ACAAAGATCA | AAATGGCTTC |
| BoAJ427338  | AAGAGCTCAA | GGAAGCCTTT | AGGGTGTGTTG | ATAAAGACCA | GAACGGTTTC |
| AtNM_180529 | AAGAGCTCAA | GGAAGCTTTT | AGGGTTTTTG  | ATAAAGACCA | GAATGGTTTC |
| AtNM_114249 | AAGAGCTTAA | GGAAGCCTTT | AGGGTTTTTG  | ACAAGGACCA | GAACGGTTTC |
| BjM88307    | AAGAGCTCAA | GGAAGCGTTC | CGGGTCTTTG  | ACAAGGACCA | GAACGGTTTC |
| AtNM_115539 | AAGAGCTCAA | GGAAGCATT  | CGGGTTTTTG  | ACAAGGACCA | GAACGGTTTC |
| AtNM_180013 | AAGAACTCAA | GGAAGCTTTT | AGAGTTTTTG  | ACAAGGACCA | GAACGGTTTC |
| AtNM_123137 | AAGAGCTAAA | AGAAGCCTTT | AGGGTTTTTG  | ACAAGGACCA | GAACGGTTTC |
| AtNM_105312 | AAGAGCTGAA | AGAAGCTTTT | AGGGTGTTCG  | ACAAGGACCA | GAACGGTTTC |
| AtNM_128261 | AAGAGCTCAA | AGAAGCTTTT | AGGGTTTTTG  | ATAAGGACCA | GAACGGTTTC |
| NtAB050848  | AGGAGCTCAA | GGAAGCTTTT | AGAGTGTTTG  | ACAAGGATCA | GAATGGATTT |
| NtAB050847  | AGGAGCTCAA | GGAAGCTTTT | AGAGTGTTTG  | ACAAGGATCA | GAACGGATTT |
| StU20296    | AGGAGCTCAA | GGAAGCTTTT | AGAGTGTTTG  | ACAAGGATCA | GAATGGATTC |
| PhM80836    | AGGAGCTCAA | AGAAGCTTTT | AGAGTGTTTG  | ACAAGGATCA | GAATGGGTTT |
| StU20295    | AGGAGCTCAA | GGAAGCTTTT | AGAGTGTTTG  | ACAAGGATCA | GAATGGATTC |
| ScAJ318520  | AGGAGCTCAA | GGAAGCTTTT | AGAGTGTTTG  | ACAAGGATCA | GAATGGATTC |
| NtAB050841  | AGGAGCTCAA | GGAAGCTTTT | AGAGTGTTTG  | ACAAGGATCA | GAACGGATTC |
| NtAB050842  | AGGAGCTAAA | GGAAGCTTTT | AGAGTGTTTG  | ACAAGGATCA | GAACGGATTC |
| NtAB050843  | AGGAGCTCAA | GGAAGCTTTT | AGAGTGTTTG  | ACAAGGATCA | GAATGGATTT |
| NtAB050844  | AGGAGCTCAA | AGAAGCTTTT | AGAGTGTTTG  | ACAAGGATCA | GAATGGATTT |
| PhM80831    | AGGAGCTCAA | GGAAGCTTTT | AGAGTGTTTG  | ACAAGGATCA | GAATGGATTT |
| CaX97558    | AGGAGCTGAA | AGAAGCTTTT | AGAGTGTTTG  | ACAAGGATCA | GAATGGATTT |
| TaU48691    | AAGAACTCAA | GGAGGCATT  | CGTGTGTTTG  | ACAAGGATCA | AAATGGTTTT |
| TaU48692    | AAGAGCTCAA | GGAGGCATT  | CGTGTGTTTG  | ACAAGGATCA | AAATGGTTTT |
| EgAF295637  | AGGAGCTCAA | GGAGGCCTTT | CGAGTGTTTG  | ACAAGGACCA | AAATGGGTTT |
| LlL18912    | AGGAGCTCAA | GGAGGCCTTT | AGAGTGTTTG  | ACAAGGACCA | GAATGGCTTC |
| LlZ12839    | AGGAGCTCAA | GGAGGCCTTT | AGAGTGTTTG  | ACAAGGACCA | GAATGGCTTC |
| OsAF042839  | AGGAGCTCAA | GGAGGCCTTT | CGTGTGTTTG  | ACAAGGACCA | GAACGGTTTC |
| OsAF441190  | AGGAGCTCAA | GGAGGCCTTT | CGTGTGTTTG  | ACAAGGACCA | GAACGGTTTC |
| OsX65016    | AGGAGCTCAA | GGAGGCCTTT | CGTGTGTTTG  | ACAAGGACCA | AAACGGTTTC |
| ZmAF031482  | AGGAGCTTAA | GGAGGCCTTT | CGCGTCTTCG  | ACAAGGGCCA | GAATGGTTTC |

|            |            |             |             |            |             |
|------------|------------|-------------|-------------|------------|-------------|
| ZmX74490   | AGGAGCTCAA | GGAGGCCTTC  | CGCGTCTTCG  | ACAAGGACCA | GAACGGTTTC  |
| TaU48242   | AGGAGCTTAA | GGAGGCCTTC  | CGTGTGTTTG  | ACAAGGACCA | GAATGGTTTC  |
| TaU48688   | AGGAGCTTAA | GGAGGCCTTC  | CGTGTGTTTG  | ACAAGGACCA | GAATGGTTTC  |
| TaU48689   | AGGAGCTTAA | GGAGGCCTTC  | CGTGTGTTTG  | ACAAGGACCA | GAATGGTTTC  |
| ZmX77397   | AGGAGCTCAA | GGAGGCCTTC  | CGTGTGTTTCG | ACAAGGACCA | GAACGGCTTC  |
| ZmY13974   | AGGAGCTCAA | GGAGGCCTTC  | CGCGTGTTTCG | ACAAGGACCA | GAACGGCTTC  |
| OsL18913   | AAGAACTCAA | GGAGGCCTTC  | CGGGTGTTTG  | ACAAGGACCA | AAATGGCTTC  |
| OsZ12827   | AAGAACTCAA | GGAGGCCTTC  | CGGGTGTTTG  | ACAAGGACCA | AAATGGCTTC  |
| OsAF441191 | AAGAACTCAA | GGAGGCCTTC  | CGGGTGTTTG  | ACAAGGACCA | AAATGGCTTC  |
| HvM27303   | AGGAGCTCAA | GGAGGCCTTC  | AGGGTGTTTCG | ACAAGGACCA | AAACGGCTTC  |
| TaU49104   | AGGAGCTCAA | GGAGGCCTTC  | AGGGTGTTTG  | ACAAGGACCA | AAACGGCTTC  |
| TaU46893   | AGGAGCTCAA | GGAGGCCTTC  | AGGGTGTTTCG | ACAAGGACCA | AAACGGCTTC  |
| TaU49103   | AGGAGCTCAA | GGAGGCCTTC  | AGGGTGTTTCG | ACAAGGACCA | AAACGGTTTC  |
| TaU49105   | AAGAGCTCAA | GGAGGCCTTC  | CGGGTGTTTCG | ACAAGGACCA | GAACGGCTTC  |
| OsAF042840 | AGGAGCTCAA | GGAGGCGTTC  | AGGGTGTTTCG | ACAAAGACCA | GAACGGCTTC  |
| ZmX77396   | AGGAGCTCAA | GGAGGCGTTC  | AGGGTGTTTCG | ACAAGGACCA | GAACGGCTTC  |
| MtAF494220 | AAGAGCTTAA | GGAAGCTTTC  | CGTGTGTTTG  | ACAAGGATCA | AAATGGTTTC  |
| MsX52398   | AAGAGCTCAA | GGAAGCTTTC  | CGTGTGTTTG  | ACAAGGATCA | AAATGGTTTC  |
| VrS81594   | AGGAGCTTAA | AGAAGCTTTC  | CGTGTGTTTCG | ACAAGGATCA | GAATGGTTTT  |
| VrL20691   | AGGAGCTTAA | AGAAGCTTTC  | CGTGTGTTTCG | ACAAGGATCA | GAATGGTTTT  |
| PvAF030034 | AGGAGCTTAA | GGAAGCTTTC  | CGTGTGTTTCG | ACAAGGATCA | GAATGGTTTT  |
| GmL01431   | AGGAGCTTAA | GGAGGCCTTC  | CGTGTGTTTCG | ACAAGGATCA | GAATGGTTTC  |
| CaY09853   | AGGAACTTAA | GGAAGCCTTC  | CGTGTGTTTG  | ACAAGGATCA | GAACGGTTTT  |
| PvAF030033 | AGGAGCTGAA | GGAGGCCTTC  | CGCGTGTTTG  | ACAAGGATCA | GAACGGTTTC  |
| AhAY517930 | AGGAACTGAA | GGAAGCCTTC  | CGGGTGCTCG  | ACAAGGATCA | AAATGGTTTC  |
| EcAY297816 | AGGAGCTCAA | GGAAGCTTTC  | CGTGTTTTTG  | ACAAGGATCA | GAATGGTTTC  |
| PaAF292108 | AGGAGCTCAA | GGAAGCCTTC  | CGGGTGTTTG  | ATAAGGACCA | GAATGGCTTC  |
| PcAY275526 | AGGAGCTCAA | GGAAGCCTTC  | CGAGTGTTTCG | ATAAGGACCA | GAATGGCTTC  |
| HaU79736   | AAGAGCTCAA | GGAAGCTTTC  | AGGGTGTTTG  | ATAAGGATCA | AAACGGTTTC  |
| BdL14071   | AGGAGCTCAA | GGAAGCTTTC  | CGAGTGTTTG  | ATAAGGATCA | GAATGGGTTTC |
| DcX59751   | AAGAACTCAA | GGAGGCATTC  | CGAGTGTTTG  | ACAAGGATCA | AAATGGTTTC  |
| DcAY364012 | AAGAACTCAA | GGAGGCATTC  | CGAGTGTTTG  | ACAAGGATCA | AAATGGTTTC  |
| NtAB050845 | AGGAGCTGAA | GGAGGCATTC  | AGAGTGTTTG  | ACAAGGACCA | GAATGGTTTC  |
| NtAB050846 | AGGAGCTGAA | GGAGGCGTTC  | AGAGTTTTTG  | ACAAGGACCA | GAATGGTTTT  |
| CaU83402   | AGGAGCTGAA | GGAGGCATTC  | AGAGTGTTTG  | ACAAGGACCA | GAATGGTTTC  |
| CaAF108889 | AGGAGCTGAA | GGAGGCATTC  | AGAGTGTTTG  | ACAAGGACCA | GAATGGTTTC  |
| CaX98404   | AGGAGCTGAA | GGAGGCATTC  | AGAGTGTTTG  | ACAAGGACCA | GAATGGTTTC  |
| StU20294   | AGGAGCTGAA | GGAGGCATTC  | AGAGTGTTTG  | ACAAGGACCA | GAATGGGTTTC |
| NtAB050839 | AGGAGCTGAA | AGAGGCATTC  | AGAGTGTTTCG | ACAAGGATCA | AAATGGCTTC  |
| NtAB050840 | AGGAACTGAA | AGAGGCGTTC  | AGAGTGTTTCG | ACAAGGATCA | GAATGGCTTC  |
| ScAJ318521 | AGGAGTTGAA | AGAGGCATTC  | AGAGTTTTTCG | ACAAGGATCA | AAATGGCTTC  |
| FsX97612   | AGGAACTTAA | AGAAGCATTC  | CGGGTTTTTG  | ACAAGGATCA | GAATGGTTTC  |
| BnAF150059 | AGGAACTTAA | AGAAGCATTC  | CGAGTTTTTCG | ACAAGGATCA | GAATGGTTTC  |
| MtAF494219 | AGGAGCTGAA | AGAAGCGTTT  | CGGGTTTTTG  | ACAAGGATCA | GAACGGTTTC  |
| PsU13882   | AGGAGCTGAA | AGAGGCATTT  | AGGGTTTTTCG | ACAAGGATCA | GAACGGATTC  |
| VrL20507   | AGGAGCTCAA | AGAGGCATTC  | CGGGTATTTCG | ACAAGGATCA | AAATGGGTTTC |
| PvAF030032 | AAGAGCTCAA | GGAAGCCTTC  | CGGGTTTTTCG | ACAAGGATCA | AAATGGGTTTC |
| GmL01432   | AGGAGCTGAA | AGAGGCATTC  | CGGGTTTTTCG | ACAAGGATCA | GAATGGGTTTC |
| GmL01430   | AGGAGCTGAA | AGAGGCGTTC  | CGAGTGTTTG  | ACAAGGACCA | GAATGGGTTTC |
| AhAY517931 | AGGAGCTGAA | GGAGGCGTTC  | CGCGTCTTTG  | ACAAGGATCA | AAACGGGTTTC |
| MdX60738   | AGGAGCTGAA | AGAGGCCTTTC | AGAGTTTTTG  | ACAAGGATCA | GAATGGCTTC  |
| VvAY070232 | AGGAGCTGAA | GAAGTCATTC  | CGAGTCTTTG  | ACAAGGATCA | GAATGGATTC  |
| BpX89890   | AGGAGTTGAA | AGAGGCGTTC  | AGAGTGTTTG  | ACAAGGACCA | AAACGGCTTC  |
| PpX90560   | AGGAGTTGAA | GGAAGCGTTT  | AAAGTATTTCG | ATAAGGATCA | GAATGGCTTC  |
| MsY13784   | AGGAACTGAA | AGAAGCTTTC  | AAAGTATTTG  | ACAAGGATCA | AAATGGCTAC  |
| DsU62865   | AGGAGTTGAG | AGAAGCATTC  | AAGGTCTTTG  | ATCGTGATGG | CAATGGGTTT  |
| MtAF494215 | ~~~~~      | ~~~~~       | ~~~~~       | ~~~~~      | ~~~~~       |

AtNM\_129674 AAGACCTCAA GAAAGATTTT AGACTCTTTG ACATAGACAA GAATGGTTTT  
 MtAF494216 ..AATTTTGT GGCAGTTTTT CATATGTGTG ACAAGGATCA GAATGGTTTT  
 MtAF494218 .....TTT

301

350

MtAF494213 GTCACTGCAT CTGAGTTGCA TTGTTACTTT ACAAATCAAG GCATTAAGAT  
 MtAF494214 GTCACTGCAT CTGAGTTGCA TTATTACTTG ACAAATCAAG GCATTAAGGC  
 MtAF494212 GTCTCTGCAT CTGAGTTGCA TTATTACTTG ACAAATCACG GCACCAAGGT  
 PsU13736 ATATCTCCCA GTGAGTTGAG ACATGTAATG ATGAATCTAG GTGAAAAATT  
 GmL01433 ATATCAGCTA GTGAGTTGAG ACACGTAATG ATCAATCTAG GGGAAAAACT  
 GmL19359 ATTTTCAGCAA GTGAGTTGAG ACACGTTATG ATCAATCTGG GTGAAAAACT  
 NtAB050849 ATATCTGCTA ACGAGCTGAG GCATGTAATG ATCAATTTAG GGGGAAACT  
 AtNM\_117546 ATCTCTGCCA GTGAGTTGAG TCATGTAATG ATAAATCTAG GAGAAAAGCT  
 OsAF231026 ATCTCCGCCG CCGAGCTCCG CCACGTGATG GCCAACATCG GGGAGCGGCT  
 OsNM\_191034 ATCTCTGCCA CCGAGCTCCG CCACGTGATG GCCAACATCG GGGAGCGGCT  
 NtAB050837 ATTTCTGCAG CTGAGCTTCG TCATGTAATG ACAAACCTTG GAGAGAAGCT  
 NtAB050838 ATTTCTGCAG CTGAGCTTCG TCATGTAATG ACAAACCTTG GAGAGAAGCT  
 StJ04559 ATTTCTGCAG CTGAGCTTCG TCATGTAATG ACAAACCTTG GAGAGAAGCT  
 CaAJ010645 ATTTCTGCTG CTGAGCTTCG TCATGTAATG ACTAACCTGG GAGAGAAGCT  
 PhM80832 ATTTTCAGCGG CTGACGTTTCG TCATGTAATG ACAAACCTTG GTGAGAACT  
 CsAF334833 ATTTCTGCTG CAGAGCTTCG ACATGTAATG ACAAATCTTG GGGAAAAGCT  
 CrAF510075 ATCTCTGCAG CAGAGCTGCG TCATGTGATG ACAAATCTTG GTGAGAAGCT  
 CcAB041712 ATTTCCGCTG CCGAGCTTCG TCATGTGATG ACGAACCTCG GCGAGAAGCT  
 CcAB044286 ATTTCCGCTG CCGAGCTTCG TCATGTGATG ACGAACCTCG GCGAGAAGCT  
 StAF468661 ATTTCTGCAG CTGAACTTCG CCACGTTATG ACAAATCTTG GTGAGAAGTT  
 SrAF474074 ATTTCTGCAG CTGAACTTCG CCACGTTATG ACAAATCTTG GTGAGAAGTT  
 BoAJ427338 ATCTCCGCGG CTGAGCTCCG ACATGTGATG ACTAACCTCG GGGAGAAGCT  
 AtNM\_180529 ATATCTGCAG CAGAGCTTCG ACATGTCATG ACAAATCTCG GTGAGAAGCT  
 AtNM\_114249 ATCTCGGCGG CTGAGCTTCG TCACGTGATG ACAAATCTTG GGGAGAAGTT  
 BjM88307 ATCTCAGCAG CTGAGCTCCG CCATGTGATG ACAAATCTAG GTGAGAAGCT  
 AtNM\_115539 ATCTCAGCAG CTGAGCTCCG CCATGTGATG ACAAACCTTG GTGAGAAGCT  
 AtNM\_180013 ATCTCAGCTG CTGAATTGAG ACATGTGATG ACTAACCTCG GCGAGAAGCT  
 AtNM\_123137 ATCTCCGCTG CTGAGCTACG CCATGTGATG ACCAATCTTG GTGAGAAGCT  
 AtNM\_105312 ATATCCGCTG CAGAGCTTCG CCATGTGATG ACGAATCTAG GTGAGAACT  
 AtNM\_128261 ATCTCGGCAG CTGAGTTAAG ACATGTAATG ACAAATCTTG GTGAGAAGTT  
 NtAB050848 ATTTCTGCAG CCGAGCTGCG CCATGTCATG ACAAACCTAG GCGAGAAGCT  
 NtAB050847 ATTTCTGCAG CCGAGCTGCG CCATGTCATG ACAAACCTAG GCGAGAAGCT  
 StU20296 ATTTCTGCAG CTGAACTACG CCATGTCATG ACAAACCTAG GCGAGAAGCT  
 PhM80836 ATTTCTGCAG CTGAGCTTCG CCATGTCATG ACAAATCTAG GCGAGAAGCT  
 StU20295 ATTTCCGCGG CTGAGCTTCG TCATGTCATG ACAAACCTAG GCGAAAAGCT  
 ScAJ318520 ATCTCCGCGG CTGAGCTTCG TCATGTCATG ACAAACCTAG GCGAAAAGCT  
 NtAB050841 ATCTCAGCAG CTGAGCTTCG TCATGTCATG ACAAACCTAG GCGAGAAGCT  
 NtAB050842 ATCTCAGCAG CTGAGCTTCG TCATGTCATG ACAAACCTAG GCGAGAAGCT  
 NtAB050843 ATCTCTGCAG CTGAGCTTCG CCATGTCATG ACAAACCTAG GTGAGAAGCT  
 NtAB050844 ATCTCAGCAG CTGAGCTTCG TCATGTCATG ACAAACCTAG GTGAGAAGCT  
 PhM80831 ATCTCTGCAG CTGAGCTTCG CCATGTCATG ACAAACCTAG GTGAGAAGCT  
 CaX97558 ATCTCTGCTG CTGAGCTTCG CCATGTCATG ACTAACCTAG GTGAGAAGCT  
 TaU48691 ATCTCTGCTG CTGAACTGCG CCATGTCATG ACCAACCTTG GTGAGAAGTT  
 TaU48692 ATCTCTGCTG CTGAACTGCG CCATGTCATG ACCAACCTTG GTGAGAAGTT  
 EgAF295637 ATCTCAGCTG CTGAGCTTCG CCATGTCATG ACCAACCTTG GTGAGAAGCT  
 L1L18912 ATCTCTGCTG CTGAGCTCCG CCATGTTATG ACCAACCTTG GCGAGAACT  
 L1Z12839 ATCTCTGCTG CTGAGCTCCG CCATGTTATG ACCAACCTTG GCGAGAACT  
 OsAF042839 ATCTCGGCTG CTGAGCTCCG CCACGTCATG ACCAACCTTG GTGAGAAGCT  
 OsAF441190 ATCTCGGCTG CTGAGCTTCG CCACGTCATG ACCAACCTTG GTGAGAAGCT  
 OsX65016 ATCTCAGCTG CTGAGCTCCG CCACGTGATG ACCAACCTTG GTGAGAAGCT  
 ZmAF031482 ATCTCGGCTG CTGAGCTCCG CCATGTCATG ACCAACCTCG GCGAGAAGCT  
 ZmX74490 ATCTCGGCTG CCGAGCTCCG CCATGTCATG ACCAACCTTG GCGAGAAGCT

|             |             |            |            |            |            |
|-------------|-------------|------------|------------|------------|------------|
| TaU48242    | ATCTCGGCAG  | CTGAACTCCG | CCATGTCATG | ACCAACCTTG | GTGAGAAGCT |
| TaU48688    | ATCTCGGCAG  | CTGAACTCCG | CCATGTCATG | ACCAACCTTG | GTGAGAAGCT |
| TaU48689    | ATCTCGGCAG  | CTGAACTCCG | CCATGTCATG | ACCAACCTTG | GTGAGAAGCT |
| ZmX77397    | ATCTCCGCTG  | CTGAGCTTCG | CCATGTCATG | ACCAACCTAG | GCGAGAAGCT |
| ZmY13974    | ATCTCTGCTG  | CTGAGCTTCG | CCATGTCATG | ACCAACCTAG | GCGAGAAGCT |
| OsL18913    | ATCTCCGCTG  | CTGAGCTCCG | CCATGTGATG | ACAAATCTTG | GCGAGAAGCT |
| OsZ12827    | ATCTCCGCTG  | CTGAGCTCCG | CCATGTGATG | ACAAATCTTG | GCGAGAAGCT |
| OsAF441191  | ATCTCCGCTG  | CTGAGCTCCG | CCATGTGATG | ACAAATCTTG | GCGAGAAGCT |
| HvM27303    | ATCTCTGCTG  | CTGAGCTCCG | CCACGTCATG | ACGAATCTCG | GCGAGAAGCT |
| TaU49104    | ATCTCTGCTG  | CTGAGCTCCG | CCACGTCATG | ACGAACCTCG | GCGAGAAGCT |
| TaU46893    | ATCTCTGCTG  | CTGAGCTCCG | CCACGTCATG | ACGAACCTCG | GCGAGAAGCT |
| TaU49103    | ATCTCTGCTG  | CTGAGCTCCG | CCATGTCATG | ACGAACCTCG | GTGAGAAGCT |
| TaU49105    | ATCTCGGCCG  | CGGAGCTCCG | CCACGTCATG | ACCAACCTTG | GCGAGAAGCT |
| OsAF042840  | ATCTCCGCCG  | CCGAGCTCCG | CCACGTCATG | ACCAACCTCG | GCGAGAAGCT |
| ZmX77396    | ATCTCTGCGG  | CGGACGTCCG | CCACGTGATG | ACCAACCTCG | GCGAGAAGCT |
| MtAF494220  | ATCTCTGCAG  | CTGAGCTCCG | TCATGTCATG | ACAAATCTCG | GAGAGAAGCT |
| MsX52398    | ATCTCTGCAG  | CTGAGCTCCG | TCATGTCATG | ACAAATCTCG | GAGAGAAGCT |
| VrS81594    | ATATCTGCTG  | CTGAGCTCCG | CCATGTTATG | ACAAATCTTG | GGGAGAAGCT |
| VrL20691    | ATATCTGCTG  | CTGAGCTCCG | CCATGTTATG | ACAAATCTTG | GGGAGAAGCT |
| PvAF030034  | ATCTCTGCTG  | CTGAGCTCCG | CCATGTTATG | ACAAATCTTG | GCGAGAAGCT |
| GmL01431    | ATCTCTGCAG  | CTGAGCTCCG | CCATGTCATG | ACAAATCTTG | GGGAGAAGCT |
| CaY09853    | ATTTCTGCAG  | CTGAGCTCCG | CCATGTTATG | ACGAATCTCG | GTGAGAAGCT |
| PvAF030033  | ATCTCTGCTG  | CAGAGCTCCG | CCATGTGATG | ACCAATCTCG | GCGAGAAGCT |
| AhAY517930  | ATCTCCGCAG  | CTGAGCTCCG | CCATGTCATG | ACCAACCTCG | GTGAGAAGTT |
| EcAY297816  | ATTTCTGCTG  | CCGAGCTTCG | TCATGTGATG | ACAAATCTCG | GCGAGAAACT |
| PaAF292108  | ATTTCTGCTG  | CTGAGCTTCG | TCATGTTATG | ACAAATCTTG | GTGAGAAGCT |
| PcAY275526  | ATTTCTGCTG  | CTGAGCTTCG | TCATGTTATG | ACAAATCTAG | GCGAGAAGCT |
| HaU79736    | ATTTCTGCGG  | CTGAGTTGCG | TCATGTCATG | ACTAATCTTG | GTGAGAAGCT |
| BdL14071    | ATTTCCAGCCG | CCGAGCTCCG | GCACGTAATG | ACAAATCTTG | GTGAGAAGTT |
| DcX59751    | ATTTCTGCTG  | CTGAGTTGCG | CCATGTTATG | ACCAACCTTG | GGGAGAAGCT |
| DcAY364012  | ATTTCTGCTG  | CTGAGTTGCG | CCATGTTATG | ACCAACCTTG | GGGAGAAGCT |
| NtAB050845  | ATTTCTGCTG  | CTGAGCTCCG | TCATGTGATG | ACCAACCTTG | GTGAGAAGCT |
| NtAB050846  | ATCTCTGCTG  | CTGAGCTCCG | TCATGTGATG | ACCAACCTTG | GTGAGAAGCT |
| CaU83402    | ATCTCTGCTG  | CTGAGCTCCG | TCACGTGATG | ACAAACCTTG | GCGAGAAGCT |
| CaAF108889  | ATCTCTGCTG  | CTGAGCTCCG | TCACGTGATG | ACAAACCTTG | GCGAGAAGCT |
| CaX98404    | ATCTCTGCTG  | CTGAGCTCCG | TCACGTGATG | ACAAACCTTG | GCGAGAAGCT |
| StU20294    | ATCTCTGCTG  | CTGAGCTCCG | TCATGTAATG | ACTAACCTTG | GTGAGAAGCT |
| NtAB050839  | ATCTCTGCAG  | CTGAGCTTCG | TCATGTGATG | ACTAACCTTG | GGGAGAAGCT |
| NtAB050840  | ATCTCCGCTG  | CTGAGCTTCG | TCATGTGATG | ACTAACCTTG | GGGAGAAGCT |
| ScAJ318521  | ATCTCAGCTG  | CTGAGCTTCG | TCATGTGATG | ACTAACCTTG | GAGAGAAGCT |
| FsX97612    | ATCTCTGCTG  | CTGAGCTGCG | CCATGTGATG | ACCAACCTCG | GTGAGAAGCT |
| BnAF150059  | ATCTCTGCTG  | ATGAGCTGCG | CCATGTGATG | ACCAACCTCG | GTGAGAAGCT |
| MtAF494219  | ATCTCTGCTG  | CTGAGCTTCG | CCATGTGATG | ACCAACCTTG | GCGAGAAGCT |
| PsU13882    | ATCTCTGCTG  | CTGAGCTTCG | CCATGTGATG | ACCAACCTTG | GTGAAAAGCT |
| VrL20507    | ATCTCTGCTG  | CTGAGCTCCG | CCATGTGATG | ACAAACCTTG | GAGAGAAGCT |
| PvAF030032  | ATTTCTGCTG  | CTGAACTCCG | CCATGTGATG | ACAAACCTTG | GAGAGAAGCT |
| GmL01432    | ATCTCTGCTG  | CTGAGCTCCG | TCATGTGATG | ACCAACCTCG | GGGAGAAACT |
| GmL01430    | ATTTCTGCTG  | CTGAGCTCCG | CCATGTGATG | ACCAACCTTG | GGGAGAAGCT |
| AhAY517931  | ATTTCTGCTG  | CTGAGCTCCG | CCACGTGATG | ACCAACCTTG | GTGAGAAGCT |
| MdX60738    | ATTTCCGCCG  | CGGAGCTCCG | CCATGTGATG | ACCAATCTTG | GGGAAAAGCT |
| VvAY070232  | ATCTCCGCTG  | CTGAGCTGCG | TCATGTAATG | ACAAACCTGG | GGGAGAAACT |
| BpX89890    | ATTTCCGCTC  | GTGAGCTGCG | CCATGTGATG | ACGAATCTTG | GTGAGAAGCT |
| PpX90560    | ATCTCTGCTG  | CGGAGCTCCG | GCACGTGATG | ACCAACCTGG | GGGAAAAGCT |
| MsY13784    | ATTTCTGCTG  | CTGACTGGCG | CCATGTCATG | ACAAATCTTG | GGGAGAAACT |
| DsU62865    | ATCTCAGCAG  | CAGAGTTGCG | GCATGTAATG | ACAAACTTGG | GCGAGAAGTT |
| MtAF494215  | ~~~~~       | ~~~~~      | ~~~~~      | ~~~~~      | ~~~~~      |
| AtNM_129674 | ATCTCAGCTG  | CTGAAATGAG | ATATGTGAGG | ACTATCTCTC | GGTGAAGCA  |



MtAF494216 GTCTCTACAT CTGAGTTGCA TTATTTTATG ACATATATCG GCCAAAAGGT  
MtAF494218 TTCTCTGCAG CTGAGCTTCG TCATGTCATA ATAACTCTTG GAAAAAACGT

351

400

MtAF494213 GACCATT... GAAGAAGCGA ACGAGTATGT TCGTGCGGCT GATTCTGATG  
MtAF494214 GACCAAT... GAAGAAGTGA GCGACTTTGT TCGTGAGGCT GATTCTGATA  
MtAF494212 GACCAAG... GAAGAAGTGG ACGAGTATGT TCGTGAGGCT GATGTTGATG  
PsU13736 AAGTGAT... GAGGAGGTGA AGCAGATGAT TAAAGAAGCA GATATGGATG  
GmL01433 AACCGAT... GAAGAGGTGG AGCAGATGAT TAAAGAAGCA GATTTGGACG  
GmL19359 AACTGAT... GAGGAGGTGG AGCAGATGAT TGAAGAAGCA GATTTGGATG  
NtAB050849 AACAGAT... GAAGAGGTTG AGCAGATGAT TAAAGAAGCA GACTTGGATG  
AtNM\_117546 AACAGAT... GAAGAAGTTG AACAAATGAT AAAGGAGGCA GATTTGGATG  
OsAF231026 CACCGAC... GAGGAGGTCG GCGAGATGAT CAGCGAGGCC GACGTGCGACG  
OsNM\_191034 CACCGAC... GAGGAGGTCG GCGAGATGAT CAGCGAGGCC GACGTGCGACG  
NtAB050837 GACTGAT... GAAGAGGTGG ATGAGATGAT CCGAGAAGCA GATATTGATG  
NtAB050838 GACTGAC... GAGGAGGTGG ATGAGATGAT CCGAGAAGCA GATATTGATG  
StJ04559 GACTGAT... GAAGAGGTGG ATGAGATGAT CCGAGAGGCA GATATTGATG  
CaAJ010645 GACTGAT... GAAGAGGTGG ATGAGATGAT CCGAGAGGCA GATATTGATG  
PhM80832 GACTGAT... GAAGAGGTTG ATGAGATGAT CCGTGAGGCA GATATGGATG  
CsAF334833 GACAGAT... GAAGAAGTCG ATGAGATGAT ACAGAAAGCA GATTTGGATG  
CrAF510075 TACTGAT... GAGGAGGTGG ATGAGATGAT CCGGGAGGCA GATGTTGATG  
CcAB041712 GACAGAC... GAGGAGGTGG ATGAAATGAT CCGGGAGGCC GATGTGCGATG  
CcAB044286 GACAGAC... GAGGAGGTGG ATGAAATGAT CCGGGAGGCC GATGTGCGATG  
StAF468661 GACTGAT... GAGGAAGTTG ATGAAATGAT CCGTGAGGCT GATGTTGATG  
SrAF474074 GACTGAT... GAGGAAGTTG ATGAAATGAT CCGTGAGGCT GATGTTGATG  
BoAJ427338 GACCGAC... GAGGAAGTTG ATGAGATGAT CCGTGAAGCT GATGTTGATG  
AtNM\_180529 ATCCGAT... GAGGAAGTTG ATGAGATGAT CCGAGAAGCG GATGTTGATG  
AtNM\_114249 GACGGAT... GAGGAAGTCC ATGAGATGAT CCGAGAGGCT GACGTGCGATG  
BjM88307 CACGGAC... GAAGAGGTTG ATGAGATGAT CAAGGAAGCT GATGTTGATG  
AtNM\_115539 TACTGAT... GAAGAAGTTG ATGAGATGAT CAAGGAAGCT GATGTTGATG  
AtNM\_180013 TACTGAT... GAAGAAGTTG ATGAGATGAT TAAGGAAGCT GATGTTGATG  
AtNM\_123137 AACTGAT... GAAGAAGTGG AAGAGATGAT CCGTGAGGCT GATGTTGATG  
AtNM\_105312 GACTGAT... GAAGAGGTGG AGGAGATGAT TCGTGAAGCA GATGTTGATG  
AtNM\_128261 AACTGAT... GAAGAAGTTG ATGAGATGAT CAAAGAAGCT GATGTTGATG  
NtAB050848 TACCGAT... GAAGAGGTTG ATGAGATGAT TCGTGAAGCT GACGTGGATG  
NtAB050847 TACTGAT... GAAGAAGTTG ATGAGATGAT TCGTGAAGCT GATGTGGATG  
StU20296 TACAGAT... GAAGAGGTTG ACGAGATGAT TCGTGAAGCT GATGTGGATG  
PhM80836 TACAGAT... GAAGAAGTTG ATGAGATGAT TCGTGAAGCC GATGTAGATG  
StU20295 TACTGAT... GAAGAGGTTG ATGAGATGAT TCGTGAAGCT GATGTGGATG  
ScAJ318520 TACTGAT... GAAGAGGTTG ATGAGATGAT TCGTGAAGCT GATGTGGATG  
NtAB050841 TACAGAT... GAAGAGGTGG ATGAGATGAT CCGTGAAGCT GATGTGGATG  
NtAB050842 TACAGAT... GAAGAGGTGG ATGAGATGAT CCGTGAAGCT GATGTGGACG  
NtAB050843 TACTGAC... GAAGAGGTTG ATGAGATGAT TCGTGAAGCT GACGTGGATG  
NtAB050844 TACAGAC... GAAGAGGTTG ATGAGATGAT TCGTGAAGCT GACGTGGATG  
PhM80831 TACAGAC... GAAGAGGTTG ATGAGATGAT CCGTGAAGCT GACGTGGATG  
CaX97558 TACAGACGAG GAGGAGGTTG ATGAGATGAT CCGTGAAGCT GACGTGGATG  
TaU48691 GACTGAT... GAGGAGGTTG ACGAGATGGT CCGTGAGGCT GATGTTGATG  
TaU48692 GACTGAT... GAGGAGGTTG ACGAGATGGT CCGTGAGGCT GATGTTGATG  
EgAF295637 TACCGAT... GAGGAGGTTG ATGAGATGAT CCGTGAGGCT GATGTTGATG  
LlL18912 GACAGAC... GAGGAGGTTG ATGAGATGAT CCGCGAGGCT GACGTGCGATG  
LlZ12839 GACAGAC... GAGGAGGTTG ATGAGATGAT CCGCGAGGCT GACGTGCGATG  
OsAF042839 GACCGAC... GAGGAAGTCG ACGAGATGAT CCGTGAGGCT GACGTGCGATG  
OsAF441190 GACCGAC... GAGGAAGTCG ACGAGATGAT CCGTGAGGCT GACGTGCGATG  
OsX65016 GACCGAC... GAGGAAGTCG ACGAGATGAT CCGTGAGGCT GACGTGCGATG  
ZmAF031482 GACTGAC... GAGGAGGTGG ACGAGATGAT CCGTGAGGCC GATGTTGACG  
ZmX74490 GACCGAC... GAGGAGGTGG ACGAGATGAT CCGTGAGGCC GACGTGCGACG  
TaU48242 GACAGAC... GAGGAGGTGG ATGAGATGAT CCGTGAGGCT GATGTGCGATG

|             |            |            |            |            |              |
|-------------|------------|------------|------------|------------|--------------|
| TaU48688    | GACAGAC... | GAGGAGGTGG | ATGAGATGAT | CCGTGAGGCT | GATGTTCGATG  |
| TaU48689    | GACAGAC... | GAGGAGGTGG | ATGAGATGAT | CCGTGAGGCT | GACGTGGATG   |
| ZmX77397    | GACGGAC... | GAGGAGGTGG | ACGAGATGAT | CCGTGAAGCC | GACGTGGACG   |
| ZmY13974    | GACGGAC... | GAGGAGGTGG | ACGAGATGAT | CCGTGAGGCC | GACGTTCGACG  |
| OsL18913    | AACTGAC... | GAGGAGGTGG | ATGAGATGAT | CCGTGAGGCT | GATGTTGATG   |
| OsZ12827    | AACTGAC... | GAGGAGGTGG | ATGAGATGAT | CCGTGAGGCT | GATGTTGATG   |
| OsAF441191  | AACTGAC... | GAGGAGGTGG | ATGAGATGAT | CCGTGAGGCT | GATGTTGATG   |
| HvM27303    | CACCGAC... | GAGGAGGTGG | ACGAGATGAT | CCGTGAAGCT | GACGTTGACG   |
| TaU49104    | CACCGAC... | GAGGAGGTGG | ACGAGATGAT | CCGTGAAGCC | GACGTTCGACG  |
| TaU46893    | CACCGAC... | GAGGAGGTGG | ACGAGATGAT | CCGTGAAGCC | GACGTTCGACG  |
| TaU49103    | CACCGAC... | GAGGAGGTGG | ACGAGATGAT | CCGTGAAGCC | GACGTTCGACG  |
| TaU49105    | AACGAC...  | GAGGAGGTGG | ACGAGATGAT | CCGTGAAGCC | GATGTTCGATG  |
| OsAF042840  | GACCGAC... | GAGGAGGTGG | ACGAGATGAT | CCGTGAAGCC | GACGTTCGACG  |
| ZmX77396    | GACCGAC... | GAGGAGGTGG | ATGAGATGAT | CCGTGAAGCC | GATGTTCGATG  |
| MtAF494220  | GACTGAT... | GAAGAAGTTG | ACGAGATGAT | TCGCGAGGCT | GATGTTGATG   |
| MsX52398    | GACTGAT... | GAAGAAGTTG | ACGAGATGAT | TCGCGAGGCT | GATGTTGATG   |
| VrS81594    | GACCGAT... | GAGGAGGTGG | ATGAGATGAT | TCGCGAGGCT | GATGTTCGACG  |
| VrL20691    | GACCGAT... | GAGGAGGTGG | ATGAGATGAT | TCGCGAGGCT | GATGTTCGACG  |
| PvAF030034  | GACCGAC... | GAGGAGGTGG | ATGAGATGAT | TCGCGAGGCT | GATGTTGATG   |
| GmL01431    | GACCGAT... | GAGGAGGTGG | ATGAGATGAT | CCGCGAGGCC | GACGTTCGATG  |
| CaY09853    | GACAGAC... | GAAGAAGTTG | ATGAGATGAT | TCGCGAGGCT | GATGTTGATG   |
| PvAF030033  | GACCTAC... | GAGGAGGTGG | ACGAGATGAT | TCGCGAGGCA | GATGTTGACG   |
| AhAY517930  | GACGGAT... | GAGGAAGTGG | ACGAGATGAT | TCGCGAGGCC | GATGTTGATG   |
| EcAY297816  | CACTGAT... | GAGGAGGTGG | ATGAGATGAT | CCGTGAGGCT | GATGTTGATG   |
| PaAF292108  | GACAGAT... | GAGGAAGTGG | ATGAGATGAT | TCGTGAGGCT | GATGTGGATG   |
| PcAY275526  | GACAGAT... | GAGGAAGTGG | ATGAGATGAT | TCGTGAGGCT | GATGTG~~~~   |
| HaU79736    | GACAGAT... | GAGGAAGTGG | ATGAGATGAT | TCGCGAGGCT | GATGTGGACG   |
| BdL14071    | GACAGAT... | GAGGAAGTGG | ATGAAATGAT | CCGTGAAGCT | GATGTGGATG   |
| DcX59751    | GACTGAC... | GAAGAAGTTG | ATGAGATGAT | TCGAGAAGCC | GATGTTGATG   |
| DcAY364012  | GACTGAC... | GAAGAAGTTG | ATGAGATGAT | TCGAGAAGCC | GATGTTGATG   |
| NtAB050845  | TACTGAT... | GAAGAAGTTG | ATGAAATGAT | TAGGGAGGCC | GATGTTCGATG  |
| NtAB050846  | TACTGAT... | GAAGAAGTTG | ATGAAATGAT | TAGGGAGGCC | GATGTTCGATG  |
| CaU83402    | TACTGAT... | GAAGAAGTTG | ATGAAATGAT | CAGGGAGGCC | GATGTGGACG   |
| CaAF108889  | TACTGAT... | GAAGAAGTTG | ATGAAATGAT | CAGGGAGGCC | GATGTGGACG   |
| CaX98404    | TACTGAT... | GAAGAAGTTG | ATGAAATGAT | CAGGGAGGCC | GATGTGGACG   |
| StU20294    | TACTGAT... | GAAGAAGTTG | ATGAAATGAT | CAGGGAGGCT | GATGTTGATG   |
| NtAB050839  | TACTGAT... | GAAGAAGTTG | ATGAGATGAT | TAGGGAAGCA | GATGTTCGATG  |
| NtAB050840  | TACTGAT... | GAAGAAGTTG | ATGAGATGAT | TAGGGAAGCA | GATGTTCGATG  |
| ScAJ318521  | CACTGAT... | GAAGAAGTGG | ATGAGATGAT | TAGGGAAGCA | GATGTTGATG   |
| FsX97612    | AACCGAT... | ...GAAGTTG | ATGAGATGAT | CAGGGAGGCT | GATGTTGATG   |
| BnAF150059  | AACCGAT... | GATGAAGTTG | ATGAGATGAT | CAGGGAGGCT | GATGTTGATG   |
| MtAF494219  | CACCGAT... | GAAGAAGTGG | ATGAGATGAT | CCGTGAGGCT | GATGTTGATG   |
| PsU13882    | CACTGAT... | GAAGAAGTGG | ATGAGATGAT | TCGAGAGGCT | GATGTTGATG   |
| VrL20507    | CACCGAT... | GAAGAGGTGG | ATGAGATGAT | TCGTGAGGCT | GATGTTGATG   |
| PvAF030032  | CACTGAT... | GAAGAGGTGG | ATGAGATGAT | TCGTGAGGCT | GATGTTGATG   |
| GmL01432    | CACCGAT... | GAAGAGGTGG | ATGAGATGAT | TCGTGAGGCT | GATGTTGATG   |
| GmL01430    | CACTGAT... | GAAGAGGTGG | ATGAGATGAT | TCGAGAGGCT | GATGTTCGATG  |
| AhAY517931  | CACTGAT... | GAAGAAGTGG | ATGAGATGAT | CCGCGAGGCT | GATGTTGATG   |
| MdX60738    | CACTGAT... | GAGGAAGTTG | ATGAGATGAT | CCGGGAGGCT | GATGTTGATG   |
| VvAY070232  | TACTGAT... | GAAGAAGTTG | ATGAGATGAT | TCGGGAGGCT | GATGTGGATG   |
| BpX89890    | TACTGAT... | GAAGAAGTTG | ATGAGATGAT | CCGAGAGGCG | GATGTTGATG   |
| PpX90560    | GACAGAC... | GAAGAAGTAG | ATGAGATGAT | CCGCGACGCC | GATGTGGATG   |
| MsY13784    | GACAGAT... | GAGGAGGTGG | ATGAAATGAT | TCGTGAAGCT | GATGTAGACG   |
| DsU62865    | GTCAGAA... | CAAGAGGTGG | AGGAGATGAT | TAGAGAGGCA | GATGTTGACA   |
| MtAF494215  | ~~~~~      | ~~~~~      | ~~~~~      | ~~~~~      | ~~~~~        |
| AtNM_129674 | AACTGAT... | GAAGAAATCG | ATGAGATTAT | CAAGGCAGCT | GATGTTGATG   |
| MtAF494216  | GACATAT... | GAAGATGTGG | AAGAATTTGT | TCGTGAGGCT | GATTTTTCGATG |

MtAF494218 GACCCAT... GAAGAGGTGA ATGAGATTAT CAAAGAGGCT GATGTTGATG

401

437

MtAF494213 GTGATGGACA TCTAAGCTTT AAGGAGTTTG TCAGA~~  
MtAF494214 GTGATGGACA TCTAAGCTTT AAGGAGTTTG TCAGA~~  
MtAF494212 GTGATGGACA AATAAACTTT GAGGAGTTTG TCAAA~~  
PsU13736 GTGATGGTCA AGTTGATTAT GATGATTTTG TGAAG~~  
GmL01433 GTGATGGCCA AGTTAACTAT GAGGAATTCG TCAAG~~  
GmL19359 GTGATGGTCA AGTTAATTAT GATGAATTTG TCAAG~~  
NtAB050849 GTGATGGTCA AGTCAACTTT GATGAATTTG TGAAA~~  
AtNM\_117546 GTGATGGCCA AGTCAATTAT GATGAATTTG TCAAG~~  
OsAF231026 GCGACGGGCA GATCAACTAC GAGGAGTTCG TCAAG~~  
OsNM\_191034 GCGACGGGCA GATCAACTAC GAGGAGTTCG TCAAG~~  
NtAB050837 GTGATGGGCA AGTTAATTAC GAGGAGTTTG TCCGC~~  
NtAB050838 GTGATGGGCA AGTTAATTAC GAGGAGTTTG TTCGC~~  
StJ04559 GTGATGGGCA AGTTAATTAT GAGGAGTTTG TCCGT~~  
CaAJ010645 GTGATGGGCA AGTTAATTAC GAGGAGTTTG TCCGC~~  
PhM80832 GCGATGGGCA AGTTAATTAT GAAGAGTTTG TCCGC~~  
CsAF334833 GTGATGGTCA GGTGAATTAT CAGGAGTTTG TAAGA~~  
CrAF510075 GTGATGGGCA AGTCAATTAC GAGGAGTTTG TGAGG~~  
CcAB041712 GCGATGGGCA AGTCAATTAC GAGGAGTTCG TGAAG~~  
CcAB044286 GCGATGGGCA AGTCAATTAC GAGGAGTTCG TGAAG~~  
StAF468661 GTGATGGTCA GATCAACTAT GAGGAATTTG TCAAG~~  
SrAF474074 GTGATGGTCA GATCAACTAT GAGGAATTTG TCAAG~~  
BoAJ427338 GCGATGGTCA GATCAACTAC GATGAGTTCG TTAAA~~  
AtNM\_180529 GCGATGGTCA GATTAACTAT GAAGAATTCG TCAAA~~  
AtNM\_114249 GTGATGGTCA GATCAACTAT GAAGAGTTCG TCAAA~~  
BjM88307 GTGATGGCCA GATTAACTAT GAGGAGTTTG TCAAG~~  
AtNM\_115539 GTGATGGTCA GATTAACTAC GAAGAGTTTG TTAAG~~  
AtNM\_180013 GTGATGGTCA GATCAACTAC GAAGAGTTTG TGAAG~~  
AtNM\_123137 GAGATGGTCA GATTAACTAT GAAGAGTTTG TCAAG~~  
AtNM\_105312 GAGATGGTCA GATAAACTAC GAGGAGTTTG TCAAG~~  
AtNM\_128261 GAGATGGTCA GATCAATTAT GAAGAGTTTG TCAAA~~  
NtAB050848 GTGATGGACA GATCAATTAT GAGGAGTTCG TCAAA~~  
NtAB050847 GTGATGGCCA GATCAACTAT GAGGAGTTCG TCAAA~~  
StU20296 GTGATGGACA GATCAACTAT GACGAGTTCG TCAAG~~  
PhM80836 GTGATGGACA GATCAACTAT GAGGAGTTCG TCAAG~~  
StU20295 GCGATGGGCA GATCAACTAC GACGAGTTCG TCAAG~~  
ScAJ318520 GCGATGGGCA GATCAACTAC GACGAGTTCG TCAAG~~  
NtAB050841 GCGATGGGCA GATCAACTAC GAGGAGTTCG TCAAG~~  
NtAB050842 GCGATGGGCA GATCAACTAC GAGGAGTTCG TCAAG~~  
NtAB050843 GCGACGGGCA GATCAACTAT GAGGAATTCG TCAAG~~  
NtAB050844 GGGACGGGCA GATCAACTAT GAGGAATTCG TCAAG~~  
PhM80831 GTGACGGCCA GATCAACTAT GAGGAGTTCG TCAAG~~  
CaX97558 GTGATGGACA AATCCAATAT GACGAGTTCG TCAAG~~  
TaU48691 GTGATGGCCA GATCAACTAT GATGAATTTG TTAAA~~  
TaU48692 GTGATGGCCA GATCAACTAT GACGAATTTG TTAAA~~  
EgAF295637 GTGATGGCCA GATCAACTAT GAGGAGTTTG TCAAA~~  
LlL18912 GCGATGGCCA GATCAACTAC GAGGAGTTTG TCAAA~~  
LlZ12839 GCGATGGCCA GATCAACTAC GAGGAGTTTG TCAAA~~  
OsAF042839 GCGATGGCCA GATCAACTAC GAGGAGTTCG TTAAG~~  
OsAF441190 GCGATGGCCA GATCAACTAC GAGGAGTTCG TTAAG~~  
OsX65016 GCGATGGCCA GATCAACTAC GAGGAGTTCG TCAAG~~  
ZmAF031482 GCGACGGCCA GATCAACTAC GAGGAGTTCG TCAAG~~  
ZmX74490 GCGACGGCCA GATCAACTAC GAGGAGTTCG TCAAG~~  
TaU48242 GTGATGGCCA GATCAATTAC GAAGAGTTTG TGAAG~~  
TaU48688 GTGATGGCCA GATCAATTAC GAAGAGTTTG TGAAG~~

|             |            |            |            |         |
|-------------|------------|------------|------------|---------|
| TaU48689    | GTGACGGCCA | GATCAATTAC | GAAGAGTTTG | TGAAG~~ |
| ZmX77397    | GTGATGGCCA | GATCAACTAC | GACGAGTTCG | TGAAG~~ |
| ZmY13974    | GCGACGGCCA | GATCAACTAC | GAGGAGTTTG | TCAAG~~ |
| OsL18913    | GTGATGGTCA | GATAAACTAT | GAGGAGTTTG | TGAAG~~ |
| OsZ12827    | GTGATGGTCA | GATAAACTAT | GAGGAGTTTG | TGAAG~~ |
| OsAF441191  | GTGATGGTCA | GATAAACTAT | GAGGAGTTTG | TGAAG~~ |
| HvM27303    | GTGATGGCCA | GATCAACTAC | GAGGAGTTCG | TCAAG~~ |
| TaU49104    | GTGATGGCCA | GATCAACTAC | GAGGAGTTCG | TCAAG~~ |
| TaU46893    | GTGATGGCCA | GATCAACTAT | GAGGAGTTTG | TCAAG~~ |
| TaU49103    | GTGATGGCCA | GATCAACTAC | GAGGAGTTCG | TCAAG~~ |
| TaU49105    | GCGACGGCCA | GATCAACTAC | GAGGAGTTCG | TTAAG~~ |
| OsAF042840  | GTGATGGCCA | GATCAACTAC | GAGGAGTTCG | TCAAG~~ |
| ZmX77396    | GTGATGGCCA | GATCAACTAC | GAGGAGTTCG | TCAAG~~ |
| MtAF494220  | GTGATGGTCA | GATCAACTAT | GAGGAGTTTG | TCAAA~~ |
| MsX52398    | GTGATGGGCA | GATCAACTAT | GAGGAGTTTG | TCAAA~~ |
| VrS81594    | GCGATGGCCA | GATCAACTAT | GAGGAGTTTG | TCAAA~~ |
| VrL20691    | GCGATGGCCA | GATCAACTAT | GAGGAGTTTG | TCAAA~~ |
| PvAF030034  | GCGATGGGCA | GATCAACTAT | GAGGAGTTTG | TCAAA~~ |
| GmL01431    | GTGATGGACA | GATCAACTAT | GAGGAGTTCG | TCAAA~~ |
| CaY09853    | GTGATGGACA | GATCAATTAT | GAGGAGTTTG | TCAAA~~ |
| PvAF030033  | GTGACGGGCA | GATCAACTAT | GAGGAGTTTG | TCAAA~~ |
| AhAY517930  | GCGACGGGCA | GATCAACTAC | GAGGAGTTTG | TCAAG~~ |
| EcAY297816  | GCGATGGTCA | GATCAACTAC | GAAGAGTTTG | TGAAA~~ |
| PaAF292108  | GTGATGGGCA | GATCAACTAC | GAGGAGTTCG | TCAAA~~ |
| PcAY275526  | ~~~~~      | ~~~~~      | ~~~~~      | ~~~~~   |
| HaU79736    | GTGATGGCCA | GATCAACTAT | GAGGAGTTTG | TTAAA~~ |
| BdL14071    | GCGATGGACA | AACTAACTAT | GAGGAGTTTG | TCAAA~~ |
| DcX59751    | GTGATGGGCA | GATCAACTAT | GAAGAATTTG | TCAAG~~ |
| DcAY364012  | GTGATGGGCA | GATCAACTAT | GAGGAATTCG | TTAAG~~ |
| NtAB050845  | GTGATGGACA | AATTAACTAT | GATGAGTTTG | TTAAG~~ |
| NtAB050846  | GTGATGGACA | AATTAACTAT | GATGAGTTTG | TTAAG~~ |
| CaU83402    | GTGATGGGCA | AATTAACTAT | GATGAATTTG | TTAAG~~ |
| CaAF108889  | GTGATGGGCA | AATTAACTAT | GATGAATTTG | TTAAG~~ |
| CaX98404    | GTGATGGCCA | AATTAACTAT | GATGAATTTG | TTAAG~~ |
| StU20294    | GCGATGGACA | AATTAACTAC | GATGAGTTTG | TTAAG~~ |
| NtAB050839  | GTGATGGTCA | AATTAACTAT | GAGGAGTTTG | TTAAG~~ |
| NtAB050840  | GTGATGGTCA | AATTAACTAT | GAGGAGTTTG | TTAAG~~ |
| ScAJ318521  | GTGATGGACA | AATCAACTAT | GAGGAGTTTG | TTAAG~~ |
| FsX97612    | GTGATGGCCA | GATAAATTAC | GAGGAGTTTG | TCAAGGT |
| BnAF150059  | GTGATGGCCA | GATAAATTAC | GAGGAGTTTG | TCAAG~~ |
| MtAF494219  | GTGATGGTCA | AATAAACTAC | GAGGAATTCG | TTAAG~~ |
| PsU13882    | GTGATGGCCA | AATAAACTAC | GAGGAATTCG | TTAAG~~ |
| VrL20507    | GTGATGGCCA | AATAAACTAC | GAGGAGTTCG | TTAAG~~ |
| PvAF030032  | GTGATGGCCA | AATAAACTAC | GAGGAGTTCG | TTAAG~~ |
| GmL01432    | GAGATGGCCA | AATAAACTAC | GAGGAGTTCG | TTAAG~~ |
| GmL01430    | GCGACGGCCA | AATAAACTAC | GAGGAGTTTG | TTAAG~~ |
| AhAY517931  | GTGACGGCCA | AATAAACTAT | GAAGAGTTTG | TCAAG~~ |
| MdX60738    | GCGATGGCCA | GATAAATTAC | GAGGAGTTTG | TCAAG~~ |
| VvAY070232  | GTGATGGGCA | GATAAACTAT | GAAGAATTCG | TGAAG~~ |
| BpX89890    | GTGATGGTCA | AATCAACTAT | GAGGAGTTTG | TTAAG~~ |
| PpX90560    | GTGACGGCCA | GGTCGACTAC | GACGAGTTTG | TGAAG~~ |
| MsY13784    | GCGACGGTCA | GGTCAACTAT | GAAGAGTTTG | TCAAA~~ |
| DsU62865    | ACGACGGACA | AGTCAACTAT | GACGAGTTTG | TGAAC~~ |
| MtAF494215  | ~~~~~      | ~~~~~      | ~~~~~      | ~~~~~   |
| AtNM_129674 | GTGATGGTCA | GATCAACTAC | AGAGAGTTTG | CCAGG~~ |
| MtAF494216  | GTGATGGACA | AATAAACATT | GAGGAGTTTG | TCAAA~~ |
| MtAF494218  | GTAATGGACT | AGTCAACTAT | AAGGAGTTTT | TTAAT~~ |
