# Supplementary material
Source: PubMed Central journal article supplement (PMC1459311)
Supplement: plntphys_pp.106.076711_3.pdf [file plntphys_pp.106.076711_3.pdf]

## Supplementary Data

Other sequence homologies ( $E < 10^{-20}$ ) identified by comparing all available BAC-end sequences from contig 410 to the GenBank nr database included four additional genes: a cell division protein FtsZ (*Pisum sativum*, T06774), Na<sup>+</sup>/H<sup>+</sup> antiporter (*Mesembryanthemum crystallinum*, AAF91423), CP12 protein precursor (*P. sativum*, T06562) and an unknown protein (*Arabidopsis thaliana*, AAM15154). Several less significant matches ( $E = 10^{-10}$ ) were found to the NBS-LRR family of disease resistance genes and to retroelements.
